# Supplementary material for: Molecular Characterization of the Oncogene BTF3 and Its Targets in Colorectal Cancer
Source: Front Cell Dev Biol. 2021 Feb 11;8:601502. doi: 10.3389/fcell.2020.601502 (PMC7905040; doi:10.3389/fcell.2020.601502)
Supplement: Supplementary file 3 [file Table_3.XLSX]

## Sheet: IgG_MS_Proteins
Protein Group	Protein ID	Accession	-10lgP	Coverage (%)	Coverage (%) Sample 2	Area Sample 2	#Peptides	#Unique	#Spec Sample 2	PTM	Avg. Mass	Description
1	17	|TRYP_PIG	275.88	87	87	27448000000	97	85	516	Carbamidomethylation; Oxidation (M); Deamidation (NQ); Acetylation (N-term); Carbamylation; 34 more	24409	SWISS-PROT:#CONTAM#P00761|TRYP_PIG Trypsin - Sus scrofa (Pig).
3	3	P35579	209.5	44	44	94490000	78	60	110	Carbamidomethylation; Oxidation (M); Deamidation (NQ); Carboxylation (E); Pyro-glu from E; 4 more	226530	Myosin-9 OS=Homo sapiens OX=9606 GN=MYH9 PE=1 SV=4
2	19	P04264	195.67	48	48	455760000	44	25	116	Carbamidomethylation; Oxidation (M); Deamidation (NQ); Carbamylation; Hexose (NSY); 7 more	66039	Keratin type II cytoskeletal 1 OS=Homo sapiens OX=9606 GN=KRT1 PE=1 SV=6
7	1	P60709	192.83	69	69	13129000	24	1	63	Carbamidomethylation; Acetylation (Protein N-term); Oxidation (M); Deamidation (NQ); Pyro-glu from Q; 3 more	41737	Actin cytoplasmic 1 OS=Homo sapiens OX=9606 GN=ACTB PE=1 SV=1
8	2	P63261	191.93	69	69	686760	24	1	57	Carbamidomethylation; Acetylation (Protein N-term); Oxidation (M); Pyro-glu from Q; Sodium adduct; 2 more	41793	Actin cytoplasmic 2 OS=Homo sapiens OX=9606 GN=ACTG1 PE=1 SV=1
5	7	P35527	190.99	54	54	361740000	34	33	81	Carbamidomethylation; Oxidation (M); Deamidation (NQ); N-Succinimidyl-2-morpholine acetate; Pyro-glu from Q; 5 more	62064	Keratin type I cytoskeletal 9 OS=Homo sapiens OX=9606 GN=KRT9 PE=1 SV=3
4	48	P13645	183.32	50	50	389650000	33	25	87	Carbamidomethylation; Oxidation (M); Deamidation (NQ); Acetylation (K); Carbamylation; 5 more	58827	Keratin type I cytoskeletal 10 OS=Homo sapiens OX=9606 GN=KRT10 PE=1 SV=6
25	109	Q86YZ3	174.58	11	11	11549000	23	23	29	Deamidation (NQ); Pyro-glu from Q; Deamidation followed by esterification with ethanol	282389	Hornerin OS=Homo sapiens OX=9606 GN=HRNR PE=1 SV=2
21	22	P68133	154.11	58	58	40988000	19	7	32	Oxidation (M); Deamidation (NQ); Acetylation (N-term); Pyro-glu from Q	42051	Actin alpha skeletal muscle OS=Homo sapiens OX=9606 GN=ACTA1 PE=1 SV=1
21	21	P68032	154.11	56	56	40757000	18	6	31	Oxidation (M); Deamidation (NQ); Acetylation (N-term); Pyro-glu from Q	42019	Actin alpha cardiac muscle 1 OS=Homo sapiens OX=9606 GN=ACTC1 PE=1 SV=1
10	57	P13647	150.93	40	40	10437000	31	5	40	Carbamidomethylation; Oxidation (M); Deamidation (NQ); Pyro-glu from Q; Acetaldehyde +26	62378	Keratin type II cytoskeletal 5 OS=Homo sapiens OX=9606 GN=KRT5 PE=1 SV=3
15	127	P02538	149.58	41	41	886480	31	2	36	Carbamidomethylation; Acetylation (Protein N-term); Oxidation (M); Deamidation (NQ); Acetylation (K); 2 more	60045	Keratin type II cytoskeletal 6A OS=Homo sapiens OX=9606 GN=KRT6A PE=1 SV=3
19	458	P12883	147.71	16	16	1394900	31	4	38	Carbamidomethylation; Deamidation (NQ)	223095	Myosin-7 OS=Homo sapiens OX=9606 GN=MYH7 PE=1 SV=5
13	390	P12882	145.73	17	17	645220	34	1	40	Carbamidomethylation; Deamidation (NQ); Methylation(KR)	223143	Myosin-1 OS=Homo sapiens OX=9606 GN=MYH1 PE=1 SV=3
17	180	P02533	143.06	36	36	8269900	18	3	33	Carbamidomethylation; Oxidation (M); Deamidation (NQ); Acetylation (K); Carbamylation; Carbamidomethylation (DHKE X@N-term)	51562	Keratin type I cytoskeletal 14 OS=Homo sapiens OX=9606 GN=KRT14 PE=1 SV=4
20	379	Q9UKX2	140.8	16	16	480430	33	3	38	Carbamidomethylation; Deamidation (NQ)	223042	Myosin-2 OS=Homo sapiens OX=9606 GN=MYH2 PE=1 SV=1
11	229	P08779	137.22	40	40	6466900	20	7	35	Carbamidomethylation; Oxidation (M); Deamidation (NQ); Acetylation (K); Carbamylation; 2 more	51268	Keratin type I cytoskeletal 16 OS=Homo sapiens OX=9606 GN=KRT16 PE=1 SV=4
23	530	P13533	136.39	13	13	289290	25	1	31	Carbamidomethylation; Deamidation (NQ); Carbamidomethylation (DHKE X@N-term)	223733	Myosin-6 OS=Homo sapiens OX=9606 GN=MYH6 PE=1 SV=5
22	527	Q9Y623	135.98	13	13	537890	27	3	33	Carbamidomethylation; Deamidation (NQ); Formylation; Methylation(KR); Carbamidomethylation (DHKE X@N-term)	223069	Myosin-4 OS=Homo sapiens OX=9606 GN=MYH4 PE=2 SV=2
24	459	P13535	130.98	12	12	895360	26	2	32	Carbamidomethylation; Deamidation (NQ); Methylation(KR)	222760	Myosin-8 OS=Homo sapiens OX=9606 GN=MYH8 PE=1 SV=3
28	10	P35580	121.89	11	11	1405400	19	4	26	Carbamidomethylation; Oxidation (M); Deamidation (NQ); Methylation(KR); Carbamidomethylation (DHKE X@N-term)	228997	Myosin-10 OS=Homo sapiens OX=9606 GN=MYH10 PE=1 SV=3
33	554	P35030	121.36	14	14	43578000	16	6	22	Carbamidomethylation; Deamidation (NQ); Dimethylation(KR); Methylation(KR); O-Ethylphosphorylation; Membrane protein extraction	32529	Trypsin-3 OS=Homo sapiens OX=9606 GN=PRSS3 PE=1 SV=2
43	103	P60660	120.3	47	47	11970000	8	6	13	Carbamidomethylation; Acetylation (Protein N-term); Deamidation (NQ)	16930	Myosin light polypeptide 6 OS=Homo sapiens OX=9606 GN=MYL6 PE=1 SV=2
31	529	P11055	120.14	9	9	97548	20	1	26	Carbamidomethylation; Deamidation (NQ)	223903	Myosin-3 OS=Homo sapiens OX=9606 GN=MYH3 PE=1 SV=3
39	7616	Q5T749	119.11	22	22	3543400	13	13	14	Carbamidomethylation; Methylation(Protein N-term); Carbamidomethylation (DHKE X@N-term)	64136	Keratinocyte proline-rich protein OS=Homo sapiens OX=9606 GN=KPRP PE=1 SV=1
32	537	P15924	113.1	6	6	4145600	20	20	23	Carbamidomethylation; Oxidation (M); Deamidation (NQ)	331774	Desmoplakin OS=Homo sapiens OX=9606 GN=DSP PE=1 SV=3
46	214	Q01546	112.75	10	10	182590	12	1	13	Carbamidomethylation; Oxidation (M); Carboxylation (E)	65841	Keratin type II cytoskeletal 2 oral OS=Homo sapiens OX=9606 GN=KRT76 PE=1 SV=2
56	74	P19105	111.21	44	44	11061000	6	6	9	Oxidation (M); Ammonia-loss (N)	19794	Myosin regulatory light chain 12A OS=Homo sapiens OX=9606 GN=MYL12A PE=1 SV=2
56	61	O14950	111.21	44	44	11061000	6	6	9	Oxidation (M); Ammonia-loss (N)	19779	Myosin regulatory light chain 12B OS=Homo sapiens OX=9606 GN=MYL12B PE=1 SV=2
37	82	P05787	104.1	14	14	391640	13	2	17	Oxidation (M); Deamidation (NQ); Acetaldehyde +26; Replacement of proton by lithium	53704	Keratin type II cytoskeletal 8 OS=Homo sapiens OX=9606 GN=KRT8 PE=1 SV=7
41	46	Q7Z406	102.81	4	4	537460	9	1	13	Carbamidomethylation; Deamidation (NQ)	227868	Myosin-14 OS=Homo sapiens OX=9606 GN=MYH14 PE=1 SV=2
54	44	P11142	102.3	18	18	3154600	10	9	10	Carbamidomethylation; Phosphorylation (STY)	70898	Heat shock cognate 71 kDa protein OS=Homo sapiens OX=9606 GN=HSPA8 PE=1 SV=1
55	250	P62805	101.85	48	48	3453000	6	6	8	Acetylation (K)	11367	Histone H4 OS=Homo sapiens OX=9606 GN=HIST1H4A PE=1 SV=2
40	483	P07477	100.89	18	18	59638000	8	2	15	Oxidation (M); Deamidation (NQ); Acetylation (N-term); Dimethylation(KR); Methylation(KR)	26558	Trypsin-1 OS=Homo sapiens OX=9606 GN=PRSS1 PE=1 SV=1
30	400	Q7Z3Y7	99.49	9	9	320630	6	1	20	Oxidation (M); Deamidation (NQ); N-Succinimidyl-2-morpholine acetate; Carbamidomethylation (DHKE X@N-term)	50567	Keratin type I cytoskeletal 28 OS=Homo sapiens OX=9606 GN=KRT28 PE=1 SV=2
49	11	P07437	99.26	26	26	360290	10	2	12	Carbamidomethylation	49671	Tubulin beta chain OS=Homo sapiens OX=9606 GN=TUBB PE=1 SV=2
42	497	P01857	97.04	18	18	230410000	6	5	17	Carbamidomethylation; Oxidation (M); Dehydration; N-Succinimidyl-2-morpholine acetate; Carbamidomethylation (DHKE X@N-term); Deamidation followed by a methylation	36106	Immunoglobulin heavy constant gamma 1 OS=Homo sapiens OX=9606 GN=IGHG1 PE=1 SV=1
53	169	P09493	96.84	25	25	561060	7	2	9		32709	Tropomyosin alpha-1 chain OS=Homo sapiens OX=9606 GN=TPM1 PE=1 SV=2
58	135	P07951	95.73	22	22	782220	6	1	9		32851	Tropomyosin beta chain OS=Homo sapiens OX=9606 GN=TPM2 PE=1 SV=1
52	16	P68371	94.16	23	23	94252	9	1	11	Carbamidomethylation	49831	Tubulin beta-4B chain OS=Homo sapiens OX=9606 GN=TUBB4B PE=1 SV=1
57	130	P06753	84.12	21	21	642640	7	3	10		32950	Tropomyosin alpha-3 chain OS=Homo sapiens OX=9606 GN=TPM3 PE=1 SV=2
65	265	P0DP25	82.09	36	36	6242400	6	6	6	Acetylation (Protein N-term); Deamidation (NQ)	16838	Calmodulin-3 OS=Homo sapiens OX=9606 GN=CALM3 PE=1 SV=1
65	269	P0DP23	82.09	36	36	6242400	6	6	6	Acetylation (Protein N-term); Deamidation (NQ)	16838	Calmodulin-1 OS=Homo sapiens OX=9606 GN=CALM1 PE=1 SV=1
65	268	P0DP24	82.09	36	36	6242400	6	6	6	Acetylation (Protein N-term); Deamidation (NQ)	16838	Calmodulin-2 OS=Homo sapiens OX=9606 GN=CALM2 PE=1 SV=1
61	5	O00159	79.4	7	7	1314900	7	7	7	Carbamidomethylation	121682	Unconventional myosin-Ic OS=Homo sapiens OX=9606 GN=MYO1C PE=1 SV=4
66	102	P20290	77.22	26	26	53364000	2	2	6		22168	Transcription factor BTF3 OS=Homo sapiens OX=9606 GN=BTF3 PE=1 SV=1
59	31	Q9BQE3	76.95	16	16	2816700	7	7	8	Carbamidomethylation	49895	Tubulin alpha-1C chain OS=Homo sapiens OX=9606 GN=TUBA1C PE=1 SV=1
63	276	P28799	76.57	10	10	2980300	7	7	8	Carbamidomethylation; Pyro-glu from Q	63545	Progranulin OS=Homo sapiens OX=9606 GN=GRN PE=1 SV=2
50	520	P05976	75.31	23	23	2723200	5	3	10	Deamidation (NQ)	21145	Myosin light chain 1/3 skeletal muscle isoform OS=Homo sapiens OX=9606 GN=MYL1 PE=2 SV=3
71	1166	P04075	72.2	15	15	2562600	5	5	5	Carbamidomethylation	39420	Fructose-bisphosphate aldolase A OS=Homo sapiens OX=9606 GN=ALDOA PE=1 SV=2
73	1324	Q02413	71.63	4	4	384290	3	3	3	Carbamidomethylation; Oxidation (M)	113748	Desmoglein-1 OS=Homo sapiens OX=9606 GN=DSG1 PE=1 SV=2
60	42	Q5VTE0	71.62	17	17	1594000	6	6	10	Carbamidomethylation	50185	Putative elongation factor 1-alpha-like 3 OS=Homo sapiens OX=9606 GN=EEF1A1P5 PE=5 SV=1
60	40	P68104	71.62	17	17	1594000	6	6	10	Carbamidomethylation	50141	Elongation factor 1-alpha 1 OS=Homo sapiens OX=9606 GN=EEF1A1 PE=1 SV=1
62	604	Q8N1N4	70.21	10	10	329260	8	2	8	Carbamidomethylation	56866	Keratin type II cytoskeletal 78 OS=Homo sapiens OX=9606 GN=KRT78 PE=1 SV=2
67	72	P67936	70.02	15	15	67553	4	1	6		28522	Tropomyosin alpha-4 chain OS=Homo sapiens OX=9606 GN=TPM4 PE=1 SV=3
64	168	E9PAV3	63.77	3	3	11366000	5	5	8	Oxidation (M); Methylmalonylation on Serine	205419	Nascent polypeptide-associated complex subunit alpha muscle-specific form OS=Homo sapiens OX=9606 GN=NACA PE=1 SV=1
64	173	Q13765	63.77	26	26	11018000	4	4	7	Oxidation (M)	23384	Nascent polypeptide-associated complex subunit alpha OS=Homo sapiens OX=9606 GN=NACA PE=1 SV=1
78	315	P33778	61.97	29	29	3982500	4	4	5		13950	Histone H2B type 1-B OS=Homo sapiens OX=9606 GN=HIST1H2BB PE=1 SV=2
78	314	P23527	61.97	29	29	3982500	4	4	5		13906	Histone H2B type 1-O OS=Homo sapiens OX=9606 GN=HIST1H2BO PE=1 SV=3
78	313	Q16778	61.97	29	29	3982500	4	4	5		13920	Histone H2B type 2-E OS=Homo sapiens OX=9606 GN=HIST2H2BE PE=1 SV=3
78	312	P06899	61.97	29	29	3982500	4	4	5		13904	Histone H2B type 1-J OS=Homo sapiens OX=9606 GN=HIST1H2BJ PE=1 SV=3
72	707	Q96A32	61.2	23	23	2478700	4	4	5	Carbamidomethylation	19015	Myosin regulatory light chain 2 skeletal muscle isoform OS=Homo sapiens OX=9606 GN=MYLPF PE=2 SV=1
82	156	P07355	58.73	9	9	693830	3	3	3		38604	Annexin A2 OS=Homo sapiens OX=9606 GN=ANXA2 PE=1 SV=2
82	174	A6NMY6	58.73	9	9	693830	3	3	3		38659	Putative annexin A2-like protein OS=Homo sapiens OX=9606 GN=ANXA2P2 PE=5 SV=2
105	224	Q96K17	57.48	16	16	15166000	1	1	1		17271	Transcription factor BTF3 homolog 4 OS=Homo sapiens OX=9606 GN=BTF3L4 PE=1 SV=1
69	80	P38646	55.97	6	6	654790	4	3	4		73681	Stress-70 protein mitochondrial OS=Homo sapiens OX=9606 GN=HSPA9 PE=1 SV=2
75	255	P04406	55.69	9	9	600250	3	2	3	Carbamidomethylation	36053	Glyceraldehyde-3-phosphate dehydrogenase OS=Homo sapiens OX=9606 GN=GAPDH PE=1 SV=3
76	155	Q04837	55.17	42	42	3898400	5	5	5		17260	Single-stranded DNA-binding protein mitochondrial OS=Homo sapiens OX=9606 GN=SSBP1 PE=1 SV=1
81	78	P08670	53.62	9	9	265670	4	3	4		53652	Vimentin OS=Homo sapiens OX=9606 GN=VIM PE=1 SV=4
77	7617	Q08554	52.65	5	5	1033100	4	4	4	Carbamidomethylation	99987	Desmocollin-1 OS=Homo sapiens OX=9606 GN=DSC1 PE=1 SV=2
74	6	P27694	52.58	10	10	889800	5	5	5	Deamidation (NQ)	68138	Replication protein A 70 kDa DNA-binding subunit OS=Homo sapiens OX=9606 GN=RPA1 PE=1 SV=2
80	983	P10916	52.49	23	23	1990800	4	4	4		18789	Myosin regulatory light chain 2 ventricular/cardiac muscle isoform OS=Homo sapiens OX=9606 GN=MYL2 PE=1 SV=3
84	515	P81605	51.84	30	30	4933000	3	3	4	Acetylation (N-term)	11284	Dermcidin OS=Homo sapiens OX=9606 GN=DCD PE=1 SV=2
87	649	P10599	51.35	21	21	828400	2	2	2		11737	Thioredoxin OS=Homo sapiens OX=9606 GN=TXN PE=1 SV=3
99	7618	P06732	49.26	9	9	3134100	3	3	3		43101	Creatine kinase M-type OS=Homo sapiens OX=9606 GN=CKM PE=1 SV=2
99	7623	P12277	49.26	4	4	1396000	1	1	1		42644	Creatine kinase B-type OS=Homo sapiens OX=9606 GN=CKB PE=1 SV=1
83	2303	P31944	46.53	18	18	688040	4	4	4		27680	Caspase-14 OS=Homo sapiens OX=9606 GN=CASP14 PE=1 SV=2
85	7624	Q96P63	41.13	4	4	413660	2	2	3		46276	Serpin B12 OS=Homo sapiens OX=9606 GN=SERPINB12 PE=1 SV=1
88	2221	O14556	39.38	4	4	130880	2	1	2		44501	Glyceraldehyde-3-phosphate dehydrogenase testis-specific OS=Homo sapiens OX=9606 GN=GAPDHS PE=1 SV=2
118	263	P61353	38.48	22	22	323090	2	2	2		15798	60S ribosomal protein L27 OS=Homo sapiens OX=9606 GN=RPL27 PE=1 SV=2
133	52	P36578	37.9	3	3	107300	1	1	1		47697	60S ribosomal protein L4 OS=Homo sapiens OX=9606 GN=RPL4 PE=1 SV=5
134	489	P60866	35.71	9	9	81203	1	1	1		13373	40S ribosomal protein S20 OS=Homo sapiens OX=9606 GN=RPS20 PE=1 SV=1
95	41	Q9NVI7	35.15	1	1	62487	1	1	1		71369	ATPase family AAA domain-containing protein 3A OS=Homo sapiens OX=9606 GN=ATAD3A PE=1 SV=2
95	134	Q5T9A4	35.15	1	1	62487	1	1	1		72573	ATPase family AAA domain-containing protein 3B OS=Homo sapiens OX=9606 GN=ATAD3B PE=1 SV=1
95	136	Q5T2N8	35.15	2	2	62487	1	1	1		46380	ATPase family AAA domain-containing protein 3C OS=Homo sapiens OX=9606 GN=ATAD3C PE=2 SV=2
100	812	Q6KB66	35.07	7	7	167540	3	3	3		50525	Keratin type II cytoskeletal 80 OS=Homo sapiens OX=9606 GN=KRT80 PE=1 SV=2
135	154	P06748	34.93	6	6	658610	1	1	1		32575	Nucleophosmin OS=Homo sapiens OX=9606 GN=NPM1 PE=1 SV=2
136	258	Q07955	34.64	4	4	80044	1	1	1		27745	Serine/arginine-rich splicing factor 1 OS=Homo sapiens OX=9606 GN=SRSF1 PE=1 SV=2
120	7627	P63316	33.67	7	7	211990	1	1	1		18402	Troponin C slow skeletal and cardiac muscles OS=Homo sapiens OX=9606 GN=TNNC1 PE=1 SV=1
137	92	P31943	33.47	4	4	79918	1	1	1		49229	Heterogeneous nuclear ribonucleoprotein H OS=Homo sapiens OX=9606 GN=HNRNPH1 PE=1 SV=4
137	264	P55795	33.47	4	4	79918	1	1	1		49264	Heterogeneous nuclear ribonucleoprotein H2 OS=Homo sapiens OX=9606 GN=HNRNPH2 PE=1 SV=1
138	574	P61513	33.02	9	9	71628	1	1	1	Carbamidomethylation	10275	60S ribosomal protein L37a OS=Homo sapiens OX=9606 GN=RPL37A PE=1 SV=2
138	878	A6NKH3	33.02	9	9	71628	1	1	1	Carbamidomethylation	10583	Putative 60S ribosomal protein L37a-like protein OS=Homo sapiens OX=9606 GN=RPL37AP8 PE=5 SV=2
114	165	P62269	32.09	5	5	176810	1	1	1		17719	40S ribosomal protein S18 OS=Homo sapiens OX=9606 GN=RPS18 PE=1 SV=3
93	1133	Q5D862	31.95	2	2	459570	3	3	3	Carbamidomethylation	248072	Filaggrin-2 OS=Homo sapiens OX=9606 GN=FLG2 PE=1 SV=1
139	823	Q8TBC3	30.86	2	2	134320	1	1	1	Acetylation (Protein N-term)	76344	SH3KBP1-binding protein 1 OS=Homo sapiens OX=9606 GN=SHKBP1 PE=1 SV=2
122	129	P10809	30.39	2	2	65245	1	1	1		61055	60 kDa heat shock protein mitochondrial OS=Homo sapiens OX=9606 GN=HSPD1 PE=1 SV=2
121	7629	A0A075B6I1	30.27	8	8	218530	1	1	1		12987	Immunoglobulin lambda variable 4-60 OS=Homo sapiens OX=9606 GN=IGLV4-60 PE=3 SV=1
140	677	Q71UM5	29.89	10	10	152470	1	1	1	Carbamidomethylation	9477	40S ribosomal protein S27-like OS=Homo sapiens OX=9606 GN=RPS27L PE=1 SV=3
140	472	P42677	29.89	10	10	152470	1	1	1	Carbamidomethylation	9461	40S ribosomal protein S27 OS=Homo sapiens OX=9606 GN=RPS27 PE=1 SV=3
113	231	P26373	29.51	9	9	308630	2	2	2		24261	60S ribosomal protein L13 OS=Homo sapiens OX=9606 GN=RPL13 PE=1 SV=4
141	374	P62851	29.47	6	6	43778	1	1	1		13742	40S ribosomal protein S25 OS=Homo sapiens OX=9606 GN=RPS25 PE=1 SV=1
142	7632	P01593	28.73	9	9	293200	1	1	1		12848	Immunoglobulin kappa variable 1D-33 OS=Homo sapiens OX=9606 GN=IGKV1D-33 PE=1 SV=2
142	7631	P01594	28.73	9	9	293200	1	1	1		12848	Immunoglobulin kappa variable 1-33 OS=Homo sapiens OX=9606 GN=IGKV1-33 PE=1 SV=2
94	7619	P20930	28.57	0	0	178540	2	2	2		435180	Filaggrin OS=Homo sapiens OX=9606 GN=FLG PE=1 SV=3
123	334	P62750	28.29	8	8	296310	1	1	1		17695	60S ribosomal protein L23a OS=Homo sapiens OX=9606 GN=RPL23A PE=1 SV=1
101	7622	P05109	28.2	19	19	980810	2	2	2	Carbamidomethylation	10835	Protein S100-A8 OS=Homo sapiens OX=9606 GN=S100A8 PE=1 SV=1
111	7621	Q01469	28.13	13	13	661160	2	2	2	Acetylation (Protein N-term)	15164	Fatty acid-binding protein 5 OS=Homo sapiens OX=9606 GN=FABP5 PE=1 SV=3
119	392	O75531	28.05	40	40	1346500	2	2	2		10059	Barrier-to-autointegration factor OS=Homo sapiens OX=9606 GN=BANF1 PE=1 SV=1
97	15	P12956	27.36	2	2	199200	1	1	1		69843	X-ray repair cross-complementing protein 6 OS=Homo sapiens OX=9606 GN=XRCC6 PE=1 SV=2
106	24	P13010	27.36	5	5	1247600	2	2	3	Oxidation (M)	82705	X-ray repair cross-complementing protein 5 OS=Homo sapiens OX=9606 GN=XRCC5 PE=1 SV=3
112	259	P16403	26.95	13	13	901550	2	2	2	Acetylation (Protein N-term)	21365	Histone H1.2 OS=Homo sapiens OX=9606 GN=HIST1H1C PE=1 SV=2
112	729	P22492	26.95	5	5	533120	1	1	1		22019	Histone H1t OS=Homo sapiens OX=9606 GN=HIST1H1T PE=2 SV=4
112	510	Q02539	26.95	5	5	533120	1	1	1		21842	Histone H1.1 OS=Homo sapiens OX=9606 GN=HIST1H1A PE=1 SV=3
112	261	P10412	26.95	5	5	533120	1	1	1		21865	Histone H1.4 OS=Homo sapiens OX=9606 GN=HIST1H1E PE=1 SV=2
112	327	P16402	26.95	5	5	533120	1	1	1		22350	Histone H1.3 OS=Homo sapiens OX=9606 GN=HIST1H1D PE=1 SV=2
108	4	O94832	26.91	1	1	102990	1	1	1		116202	Unconventional myosin-Id OS=Homo sapiens OX=9606 GN=MYO1D PE=1 SV=2
124	7630	P00338	26.83	6	6	444120	2	2	2		36689	L-lactate dehydrogenase A chain OS=Homo sapiens OX=9606 GN=LDHA PE=1 SV=2
127	577	Q16695	26.28	5	5	115960	1	1	1		15508	Histone H3.1t OS=Homo sapiens OX=9606 GN=HIST3H3 PE=1 SV=3
127	610	P84243	26.28	5	5	115960	1	1	1		15328	Histone H3.3 OS=Homo sapiens OX=9606 GN=H3F3A PE=1 SV=2
127	576	Q71DI3	26.28	5	5	115960	1	1	1		15388	Histone H3.2 OS=Homo sapiens OX=9606 GN=HIST2H3A PE=1 SV=3
127	575	P68431	26.28	5	5	115960	1	1	1		15404	Histone H3.1 OS=Homo sapiens OX=9606 GN=HIST1H3A PE=1 SV=2
103	110	P12236	26.06	4	4	447890	1	1	1		32866	ADP/ATP translocase 3 OS=Homo sapiens OX=9606 GN=SLC25A6 PE=1 SV=4
103	53	P05141	26.06	4	4	447890	1	1	1		32852	ADP/ATP translocase 2 OS=Homo sapiens OX=9606 GN=SLC25A5 PE=1 SV=7
103	152	P12235	26.06	4	4	447890	1	1	1		33065	ADP/ATP translocase 1 OS=Homo sapiens OX=9606 GN=SLC25A4 PE=1 SV=4
103	505	Q9H0C2	26.06	4	4	447890	1	1	1		35022	ADP/ATP translocase 4 OS=Homo sapiens OX=9606 GN=SLC25A31 PE=2 SV=1
126	84	P15880	25.66	7	7	139320	2	2	2	Carbamidomethylation	31324	40S ribosomal protein S2 OS=Homo sapiens OX=9606 GN=RPS2 PE=1 SV=2
128	204	P62829	25.44	7	7	135050	1	1	1		14865	60S ribosomal protein L23 OS=Homo sapiens OX=9606 GN=RPL23 PE=1 SV=1
86	7637	Q9NZT1	25.4	16	16	854300	1	1	2	Deamidation (NQ)	15893	Calmodulin-like protein 5 OS=Homo sapiens OX=9606 GN=CALML5 PE=1 SV=2
146	200	P61313	25.35	4	4	69047	1	1	1		24146	60S ribosomal protein L15 OS=Homo sapiens OX=9606 GN=RPL15 PE=1 SV=2
102	6447	Q08188	25.09	3	3	199620	2	2	2		76632	Protein-glutamine gamma-glutamyltransferase E OS=Homo sapiens OX=9606 GN=TGM3 PE=1 SV=4
147	7642	Q86SG5	24.81	12	12	253710	1	1	1	Carbamidomethylation	11305	Protein S100-A7A OS=Homo sapiens OX=9606 GN=S100A7A PE=1 SV=3
98	974	P06312	24.7	8	8	1041600	1	1	1		13380	Immunoglobulin kappa variable 4-1 OS=Homo sapiens OX=9606 GN=IGKV4-1 PE=1 SV=1
129	222	P35244	24.69	14	14	269360	1	1	1		13569	Replication protein A 14 kDa subunit OS=Homo sapiens OX=9606 GN=RPA3 PE=1 SV=1
116	158	P62424	24.56	4	4	235980	1	1	1		29996	60S ribosomal protein L7a OS=Homo sapiens OX=9606 GN=RPL7A PE=1 SV=2
148	4836	P15259	24.54	4	4	94212	1	1	1		28766	Phosphoglycerate mutase 2 OS=Homo sapiens OX=9606 GN=PGAM2 PE=1 SV=3
148	4837	P18669	24.54	4	4	94212	1	1	1		28804	Phosphoglycerate mutase 1 OS=Homo sapiens OX=9606 GN=PGAM1 PE=1 SV=2
130	272	P16401	24.54	5	5	790300	1	1	1		22580	Histone H1.5 OS=Homo sapiens OX=9606 GN=HIST1H1B PE=1 SV=3
131	7640	Q5T750	24.53	3	3	314020	1	1	1		26238	Skin-specific protein 32 OS=Homo sapiens OX=9606 GN=XP32 PE=1 SV=1
91	1126	Q8NB49	24.42	1	1	793310	1	1	1		129477	Phospholipid-transporting ATPase IG OS=Homo sapiens OX=9606 GN=ATP11C PE=1 SV=3

## Sheet: BTF3_MS_Proteins
Table S3 BTF3 specific proteins
Table S3 542 proteins showed BTF3 specific expression	Protein ID	Accession	genename	-10lgP	Coverage (%)	Coverage (%) Sample 1	Area Sample 1	#Peptides	#Unique	#Spec Sample 1	PTM	Avg. Mass	Description
1	3	P35579	MYH9	387.32	71	71	5030000000	205	150	539	Carbamidomethylation; Acetylation (Protein N-term); Oxidation (M); Deamidation (NQ); Acetylation (K); 14 more	226530	Myosin-9 OS=Homo sapiens OX=9606 GN=MYH9 PE=1 SV=4
3	1	P60709	ACTB	311	87	87	235000000	64	1	313	Carbamidomethylation; Acetylation (Protein N-term); Oxidation (M); Deamidation (NQ); Acetylation (K); 17 more	41737	Actin cytoplasmic 1 OS=Homo sapiens OX=9606 GN=ACTB PE=1 SV=1
4	2	P63261	ACTG1	309.27	87	87	113000000	63	1	306	Carbamidomethylation; Acetylation (Protein N-term); Oxidation (M); Deamidation (NQ); Acetylation (K); 17 more	41793	Actin cytoplasmic 2 OS=Homo sapiens OX=9606 GN=ACTG1 PE=1 SV=1
5	10	P35580	MYH10	309.11	51	51	191000000	112	64	182	Carbamidomethylation; Oxidation (M); Deamidation (NQ); Acetylation (K); N-Succinimidyl-2-morpholine acetate; 8 more	228997	Myosin-10 OS=Homo sapiens OX=9606 GN=MYH10 PE=1 SV=3
2	17	|TRYP_PIG		301.12	89	89	24800000000	90	84	408	Carbamidomethylation; Oxidation (M); Deamidation (NQ); Acetylation (N-term); Carbamylation; 23 more	24409	SWISS-PROT:#CONTAM#P00761|TRYP_PIG Trypsin - Sus scrofa (Pig).
9	4	O94832	MYO1D	283.21	64	64	223000000	63	59	91	Carbamidomethylation; Oxidation (M); Deamidation (NQ); Pyro-glu from Q	116202	Unconventional myosin-Id OS=Homo sapiens OX=9606 GN=MYO1D PE=1 SV=2
16	5	O00159	MYO1C	272.39	51	51	304000000	52	48	73	Carbamidomethylation; Oxidation (M); Deamidation (NQ); Ammonia-loss (N)	121682	Unconventional myosin-Ic OS=Homo sapiens OX=9606 GN=MYO1C PE=1 SV=4
18	102	P20290	BTF3	261.9	80	80	742000000	25	19	63	Carbamidomethylation; Oxidation (M); Deamidation (NQ); Acetylation (K); Methylation(KR); 2 more	22168	Transcription factor BTF3 OS=Homo sapiens OX=9606 GN=BTF3 PE=1 SV=1
28	6	P27694	RPA1	257.37	56	56	230000000	35	35	57	Carbamidomethylation; Oxidation (M); Deamidation (NQ); Replacement of proton with ammonium ion	68138	Replication protein A 70 kDa DNA-binding subunit OS=Homo sapiens OX=9606 GN=RPA1 PE=1 SV=2
24	9	O43795	MYO1B	253.78	40	40	107000000	45	38	61	Carbamidomethylation; Oxidation (M); Deamidation (NQ); Pyro-glu from Q; Ammonia-loss (N)	131985	Unconventional myosin-Ib OS=Homo sapiens OX=9606 GN=MYO1B PE=1 SV=3
21	25	Q9Y4I1	MYO5A	240.8	32	32	65900000	56	56	63	Carbamidomethylation; Acetylation (Protein N-term); Formylation; Phosphorylation (STY); 2-amino-3-oxo-butanoic_acid	215403	Unconventional myosin-Va OS=Homo sapiens OX=9606 GN=MYO5A PE=1 SV=2
31	7	P35527	KRT9	237.23	54	54	175000000	29	28	54	Carbamidomethylation; Oxidation (M); Deamidation (NQ); Pyro-glu from Q	62064	Keratin type I cytoskeletal 9 OS=Homo sapiens OX=9606 GN=KRT9 PE=1 SV=3
25	61	O14950	MYL12B	234.89	84	84	206000000	19	6	57	Carbamidomethylation; Oxidation (M); Deamidation (NQ); Sodium adduct; Acetaldehyde +26; 2 more	19779	Myosin regulatory light chain 12B OS=Homo sapiens OX=9606 GN=MYL12B PE=1 SV=2
11	65	Q13813	SPTAN1	232.22	35	35	42400000	75	75	80	Carbamidomethylation; Acetylation (Protein N-term); Deamidation (NQ)	284538	Spectrin alpha chain non-erythrocytic 1 OS=Homo sapiens OX=9606 GN=SPTAN1 PE=1 SV=3
20	11	P07437	TUBB	231.08	67	67	28100000	25	4	62	Carbamidomethylation; Oxidation (M); Deamidation (NQ)	49671	Tubulin beta chain OS=Homo sapiens OX=9606 GN=TUBB PE=1 SV=2
19	19	P04264	KRT1	229.13	46	46	198000000	40	21	67	Carbamidomethylation; Oxidation (M); Deamidation (NQ); N-Succinimidyl-2-morpholine acetate; Pyro-glu from Q; Acetaldehyde +26	66039	Keratin type II cytoskeletal 1 OS=Homo sapiens OX=9606 GN=KRT1 PE=1 SV=6
23	38	P21333	FLNA	222.63	26	26	38600000	54	49	59	Carbamidomethylation; Deamidation (NQ)	280737	Filamin-A OS=Homo sapiens OX=9606 GN=FLNA PE=1 SV=4
7	22	P68133	ACTA1	215.67	55	55	741000	35	1	149	Oxidation (M); Deamidation (NQ); Acetylation (K); Acetylation (N-term); Carbamylation; 13 more	42051	Actin alpha skeletal muscle OS=Homo sapiens OX=9606 GN=ACTA1 PE=1 SV=1
34	37	Q6WCQ1	MPRIP	214.68	45	45	51500000	38	38	46	Carbamidomethylation; Ammonia-loss (N)	116533	Myosin phosphatase Rho-interacting protein OS=Homo sapiens OX=9606 GN=MPRIP PE=1 SV=3
43	24	P13010	XRCC5	213.89	39	39	135000000	27	27	37	Carbamidomethylation; Oxidation (M)	82705	X-ray repair cross-complementing protein 5 OS=Homo sapiens OX=9606 GN=XRCC5 PE=1 SV=3
45	26	P52272	HNRNPM	213.83	45	45	38300000	30	29	36	Carbamidomethylation; Acetylation (Protein N-term); Oxidation (M); Deamidation (NQ)	77516	Heterogeneous nuclear ribonucleoprotein M OS=Homo sapiens OX=9606 GN=HNRNPM PE=1 SV=3
35	15	P12956	XRCC6	213.06	46	46	164000000	31	31	43	Carbamidomethylation; Oxidation (M); Deamidation (NQ); Pyro-glu from Q	69843	X-ray repair cross-complementing protein 6 OS=Homo sapiens OX=9606 GN=XRCC6 PE=1 SV=2
15	168	E9PAV3	NACA	213.02	5	5	1250000000	25	25	70	Oxidation (M); Deamidation (NQ); Acetylation (K); Acetylation (N-term); Amidation; 5 more	205419	Nascent polypeptide-associated complex subunit alpha muscle-specific form OS=Homo sapiens OX=9606 GN=NACA PE=1 SV=1
15	173	Q13765	NACA	213.02	49	49	1250000000	25	25	70	Oxidation (M); Deamidation (NQ); Acetylation (K); Acetylation (N-term); Amidation; 5 more	23384	Nascent polypeptide-associated complex subunit alpha OS=Homo sapiens OX=9606 GN=NACA PE=1 SV=1
22	16	P68371	TUBB4B	208.15	60	60	3840000	24	1	59	Carbamidomethylation; Oxidation (M); Deamidation (NQ)	49831	Tubulin beta-4B chain OS=Homo sapiens OX=9606 GN=TUBB4B PE=1 SV=1
17	90	P78527	PRKDC	207.82	17	17	42200000	68	68	69	Carbamidomethylation; O-Diisopropylphosphorylation	469093	DNA-dependent protein kinase catalytic subunit OS=Homo sapiens OX=9606 GN=PRKDC PE=1 SV=3
38	48	P13645	KRT10	207.08	48	48	112000000	27	22	45	Carbamidomethylation; Oxidation (M); Deamidation (NQ); Dehydration; Pyro-glu from Q; 2 3-dihydro-2 2-dimethyl-7-benzofuranol N-methyl carbamate	58827	Keratin type I cytoskeletal 10 OS=Homo sapiens OX=9606 GN=KRT10 PE=1 SV=6
41	32	P12814	ACTN1	204.58	40	40	9680000	29	14	33	Carbamidomethylation	103058	Alpha-actinin-1 OS=Homo sapiens OX=9606 GN=ACTN1 PE=1 SV=2
26	13	Q13885	TUBB2A	204.46	51	51	373000	21	1	55	Carbamidomethylation; Oxidation (M); Deamidation (NQ)	49907	Tubulin beta-2A chain OS=Homo sapiens OX=9606 GN=TUBB2A PE=1 SV=1
27	14	Q9BVA1	TUBB2B	204.01	51	51	483000	21	1	55	Carbamidomethylation; Oxidation (M); Deamidation (NQ)	49953	Tubulin beta-2B chain OS=Homo sapiens OX=9606 GN=TUBB2B PE=1 SV=1
40	99	P24844	MYL9	203.01	60	60	626000	15	2	41	Oxidation (M); Deamidation (NQ); Acetaldehyde +26; Ammonia-loss (N)	19827	Myosin regulatory light polypeptide 9 OS=Homo sapiens OX=9606 GN=MYL9 PE=1 SV=4
37	35	O43707	ACTN4	202.31	38	38	20900000	32	18	38	Carbamidomethylation; Oxidation (M); Deamidation (NQ)	104854	Alpha-actinin-4 OS=Homo sapiens OX=9606 GN=ACTN4 PE=1 SV=2
13	115	Q15149	PLEC	200.96	16	16	26100000	68	68	72	Carbamidomethylation; Phosphorylation (STY)	531796	Plectin OS=Homo sapiens OX=9606 GN=PLEC PE=1 SV=3
39	57	P13647	KRT5	200.85	53	53	12500000	37	6	43	Carbamidomethylation; Oxidation (M); Pyro-glu from Q; Oxidation to nitro	62378	Keratin type II cytoskeletal 5 OS=Homo sapiens OX=9606 GN=KRT5 PE=1 SV=3
79	40	P68104	EEF1A1	199.54	43	43	82500000	17	17	21	Carbamidomethylation; Oxidation (M); Dimethylation(KR); Methylation(KR)	50141	Elongation factor 1-alpha 1 OS=Homo sapiens OX=9606 GN=EEF1A1 PE=1 SV=1
79	42	Q5VTE0	EEF1A1P5	199.54	43	43	82500000	17	17	21	Carbamidomethylation; Oxidation (M); Dimethylation(KR); Methylation(KR)	50185	Putative elongation factor 1-alpha-like 3 OS=Homo sapiens OX=9606 GN=EEF1A1P5 PE=5 SV=1
55	27	P68366	TUBA4A	199.04	58	58	5730000	20	4	32	Carbamidomethylation; Oxidation (M); Pyro-glu from Q	49924	Tubulin alpha-4A chain OS=Homo sapiens OX=9606 GN=TUBA4A PE=1 SV=1
30	76	Q01082	SPTBN1	198.18	24	24	23100000	49	45	53	Carbamidomethylation; Deamidation (NQ)	274608	Spectrin beta chain non-erythrocytic 1 OS=Homo sapiens OX=9606 GN=SPTBN1 PE=1 SV=2
57	41	Q9NVI7	ATAD3A	196.6	39	39	10900000	25	6	31	Oxidation (M); Ethylation	71369	ATPase family AAA domain-containing protein 3A OS=Homo sapiens OX=9606 GN=ATAD3A PE=1 SV=2
29	46	Q7Z406	MYH14	196.59	9	9	1240000	27	1	53	Carbamidomethylation; Oxidation (M); Deamidation (NQ); Acetylation (K); Pyro-glu from Q; 4 more	227868	Myosin-14 OS=Homo sapiens OX=9606 GN=MYH14 PE=1 SV=2
54	36	Q71U36	TUBA1A	196.29	58	58	318000	20	1	33	Carbamidomethylation; Oxidation (M); Pyro-glu from Q; Sodium adduct	50136	Tubulin alpha-1A chain OS=Homo sapiens OX=9606 GN=TUBA1A PE=1 SV=1
49	44	P11142	HSPA8	195.12	44	44	40700000	25	19	33	Carbamidomethylation; Oxidation (M); Deamidation (NQ); Methylation(KR); Ammonia-loss (N)	70898	Heat shock cognate 71 kDa protein OS=Homo sapiens OX=9606 GN=HSPA8 PE=1 SV=1
33	103	P60660	MYL6	194.26	71	71	525000000	14	9	50	Carbamidomethylation; Acetylation (Protein N-term); Oxidation (M); Deamidation (NQ); Pyro-glu from E; 3 more	16930	Myosin light polypeptide 6 OS=Homo sapiens OX=9606 GN=MYL6 PE=1 SV=2
53	45	P02545	LMNA	192.94	44	44	45600000	28	28	32	Carbamidomethylation; Deamidation (NQ)	74140	Prelamin-A/C OS=Homo sapiens OX=9606 GN=LMNA PE=1 SV=1
56	51	Q9UHB6	LIMA1	189.54	39	39	25600000	26	26	31	Carbamidomethylation; Acetylation (Protein N-term); Deamidation (NQ); Acetylation (N-term); Pyro-glu from Q	85226	LIM domain and actin-binding protein 1 OS=Homo sapiens OX=9606 GN=LIMA1 PE=1 SV=1
10	75	Q562R1	ACTBL2	187.77	43	43	3160000	23	3	85	Carbamidomethylation; Oxidation (M); Deamidation (NQ); Acetylation (K); Acetylation (N-term); 11 more	42003	Beta-actin-like protein 2 OS=Homo sapiens OX=9606 GN=ACTBL2 PE=1 SV=2
64	68	Q69YQ0	SPECC1L	186.16	25	25	21200000	24	24	27	Carbamidomethylation; Oxidation (M)	124602	Cytospin-A OS=Homo sapiens OX=9606 GN=SPECC1L PE=1 SV=2
48	62	O14974	PPP1R12A	185.81	29	29	26800000	29	28	34	Carbamidomethylation; Deamidation (NQ); Pyro-glu from Q	115281	Protein phosphatase 1 regulatory subunit 12A OS=Homo sapiens OX=9606 GN=PPP1R12A PE=1 SV=1
62	56	P06396	GSN	185.56	26	26	58400000	20	20	25	Carbamidomethylation; Pyro-glu from Q	85697	Gelsolin OS=Homo sapiens OX=9606 GN=GSN PE=1 SV=1
72	33	Q9NYL9	TMOD3	185.33	57	57	68300000	17	17	24	Carbamidomethylation; Oxidation (M); Deamidation (NQ); Pyro-glu from Q	39595	Tropomodulin-3 OS=Homo sapiens OX=9606 GN=TMOD3 PE=1 SV=1
74	53	P05141	SLC25A5	184.2	55	55	14600000	19	8	22	Carbamidomethylation; Acetylation (Protein N-term); Methylphosphonylation	32852	ADP/ATP translocase 2 OS=Homo sapiens OX=9606 GN=SLC25A5 PE=1 SV=7
61	63	Q00610	CLTC	183.94	18	18	13400000	26	26	26	Carbamidomethylation; Lysine oxidation to aminoadipic semialdehyde	191613	Clathrin heavy chain 1 OS=Homo sapiens OX=9606 GN=CLTC PE=1 SV=5
69	70	Q9ULV4	CORO1C	180.64	35	35	23300000	21	18	27	Carbamidomethylation; Deamidation (NQ); Pyro-glu from Q	53249	Coronin-1C OS=Homo sapiens OX=9606 GN=CORO1C PE=1 SV=1
52	82	P05787	KRT8	180.46	50	50	21000000	29	17	33	Pyro-glu from Q	53704	Keratin type II cytoskeletal 8 OS=Homo sapiens OX=9606 GN=KRT8 PE=1 SV=7
120	224	Q96K17	BTF3L4	180.16	70	70	122000000	13	8	16	Acetylation (K); Carbamidomethylation (DHKE X@N-term)	17271	Transcription factor BTF3 homolog 4 OS=Homo sapiens OX=9606 GN=BTF3L4 PE=1 SV=1
111	47	P11940	PABPC1	179.37	25	25	9560000	15	11	16	Carbamidomethylation; Deamidation (NQ)	70671	Polyadenylate-binding protein 1 OS=Homo sapiens OX=9606 GN=PABPC1 PE=1 SV=2
75	78	P08670	VIM	176.99	49	49	30200000	22	19	23		53652	Vimentin OS=Homo sapiens OX=9606 GN=VIM PE=1 SV=4
98	50	P62701	RPS4X	175.94	56	56	31900000	15	15	17	Carbamidomethylation; Oxidation (M); Deamidation (NQ); Ethanolation (KR)	29598	40S ribosomal protein S4 X isoform OS=Homo sapiens OX=9606 GN=RPS4X PE=1 SV=2
92	52	P36578	RPL4	175.67	43	43	38600000	16	16	20	Carbamidomethylation; Oxidation (M); Deamidation (NQ)	47697	60S ribosomal protein L4 OS=Homo sapiens OX=9606 GN=RPL4 PE=1 SV=5
65	77	Q07157	TJP1	173.7	18	18	10000000	26	26	26	Deamidation (NQ)	195457	Tight junction protein ZO-1 OS=Homo sapiens OX=9606 GN=TJP1 PE=1 SV=3
80	71	P42166	TMPO	173.48	32	32	11800000	18	13	22	Carbamidomethylation; Deamidation (NQ)	75492	Lamina-associated polypeptide 2 isoform alpha OS=Homo sapiens OX=9606 GN=TMPO PE=1 SV=2
82	83	Q00839	HNRNPU	173.47	24	24	22400000	20	20	22	Carbamidomethylation; Oxidation (M); Deamidation (NQ); Dimethylation(KR)	90585	Heterogeneous nuclear ribonucleoprotein U OS=Homo sapiens OX=9606 GN=HNRNPU PE=1 SV=6
46	119	Q9BZF9	UACA	173.18	21	21	11800000	29	29	31	Carbamidomethylation	162504	Uveal autoantigen with coiled-coil domains and ankyrin repeats OS=Homo sapiens OX=9606 GN=UACA PE=1 SV=2
68	155	Q04837	SSBP1	172.36	64	64	226000000	11	11	24	Oxidation (M); Deamidation (NQ); Sodium adduct	17260	Single-stranded DNA-binding protein mitochondrial OS=Homo sapiens OX=9606 GN=SSBP1 PE=1 SV=1
86	91	P05783	KRT18	172.32	43	43	25100000	18	12	21	Deamidation (NQ); Pyro-glu from Q	48058	Keratin type I cytoskeletal 18 OS=Homo sapiens OX=9606 GN=KRT18 PE=1 SV=2
60	72	P67936	TPM4	171.01	55	55	45100000	17	7	26	Carbamidomethylation; Acetylation (Protein N-term); Oxidation (M); Deamidation (NQ); Dimethylation(KR); Ethylation	28522	Tropomyosin alpha-4 chain OS=Homo sapiens OX=9606 GN=TPM4 PE=1 SV=3
63	100	Q9BUF5	TUBB6	170.76	30	30	3060000	13	2	26	Carbamidomethylation; Oxidation (M); Deamidation (NQ)	49857	Tubulin beta-6 chain OS=Homo sapiens OX=9606 GN=TUBB6 PE=1 SV=1
78	87	P40222	TXLNA	170.49	38	38	30900000	20	20	20	Deamidation (NQ)	61891	Alpha-taxilin OS=Homo sapiens OX=9606 GN=TXLNA PE=1 SV=3
81	67	Q16643	DBN1	170.29	31	31	45200000	18	18	22	Carbamidomethylation; Acetylation (Protein N-term); Oxidation (M); Deamidation (NQ); Phosphorylation (STY)	71429	Drebrin OS=Homo sapiens OX=9606 GN=DBN1 PE=1 SV=4
84	265	P0DP25	CALM3	170.2	50	50	208000000	10	8	20	Acetylation (Protein N-term); Oxidation (M); Deamidation (NQ); Sodium adduct; Menadione quinone derivative	16838	Calmodulin-3 OS=Homo sapiens OX=9606 GN=CALM3 PE=1 SV=1
84	269	P0DP23	CALM1	170.2	50	50	208000000	10	8	20	Acetylation (Protein N-term); Oxidation (M); Deamidation (NQ); Sodium adduct; Menadione quinone derivative	16838	Calmodulin-1 OS=Homo sapiens OX=9606 GN=CALM1 PE=1 SV=1
84	268	P0DP24	CALM2	170.2	50	50	208000000	10	8	20	Acetylation (Protein N-term); Oxidation (M); Deamidation (NQ); Sodium adduct; Menadione quinone derivative	16838	Calmodulin-2 OS=Homo sapiens OX=9606 GN=CALM2 PE=1 SV=1
66	88	Q13045	FLII	169.74	21	21	12600000	24	24	25	Carbamidomethylation; Acetylation (Protein N-term); Deamidation (NQ)	144751	Protein flightless-1 homolog OS=Homo sapiens OX=9606 GN=FLII PE=1 SV=2
94	69	Q9NUQ3	TXLNG	168.84	27	27	17000000	13	13	18	Carbamidomethylation	60586	Gamma-taxilin OS=Homo sapiens OX=9606 GN=TXLNG PE=1 SV=2
124	101	P47756	CAPZB	167.59	40	40	27100000	11	11	14	Carbamidomethylation; Acetylation (Protein N-term); Deamidation (NQ)	31350	F-actin-capping protein subunit beta OS=Homo sapiens OX=9606 GN=CAPZB PE=1 SV=4
112	64	P17844	DDX5	167.57	25	25	4620000	16	9	17	Carbamidomethylation; Oxidation (M)	69148	Probable ATP-dependent RNA helicase DDX5 OS=Homo sapiens OX=9606 GN=DDX5 PE=1 SV=1
89	86	P08238	HSP90AB1	166.97	30	30	9110000	19	11	20	Carbamidomethylation	83264	Heat shock protein HSP 90-beta OS=Homo sapiens OX=9606 GN=HSP90AB1 PE=1 SV=4
113	66	Q92841	DDX17	166.61	21	21	3810000	15	8	16	Carbamidomethylation; Oxidation (M)	80273	Probable ATP-dependent RNA helicase DDX17 OS=Homo sapiens OX=9606 GN=DDX17 PE=1 SV=2
87	109	Q86YZ3	HRNR	163.84	8	8	5960000	17	17	20	Deamidation (NQ)	282389	Hornerin OS=Homo sapiens OX=9606 GN=HRNR PE=1 SV=2
125	80	P38646	HSPA9	162.94	25	25	6840000	14	12	15	Carbamidomethylation; Deamidation (NQ)	73681	Stress-70 protein mitochondrial OS=Homo sapiens OX=9606 GN=HSPA9 PE=1 SV=2
147	92	P31943	HNRNPH1	160.93	28	28	11000000	10	8	14	Carbamidomethylation; Acetylation (Protein N-term); Deamidation (NQ)	49229	Heterogeneous nuclear ribonucleoprotein H OS=Homo sapiens OX=9606 GN=HNRNPH1 PE=1 SV=4
115	110	P12236	SLC25A6	160.27	39	39	1620000	13	1	16	Carbamidomethylation; Carbamylation	32866	ADP/ATP translocase 3 OS=Homo sapiens OX=9606 GN=SLC25A6 PE=1 SV=4
67	134	Q5T9A4	ATAD3B	159.44	33	33	3450000	22	4	26	Carbamidomethylation	72573	ATPase family AAA domain-containing protein 3B OS=Homo sapiens OX=9606 GN=ATAD3B PE=1 SV=1
104	96	P39023	RPL3	157.43	39	39	24700000	15	15	17	Carbamidomethylation; Deamidation (NQ)	46109	60S ribosomal protein L3 OS=Homo sapiens OX=9606 GN=RPL3 PE=1 SV=2
142	89	P05388	RPLP0	156.93	46	46	26700000	11	11	14	Carbamidomethylation	34274	60S acidic ribosomal protein P0 OS=Homo sapiens OX=9606 GN=RPLP0 PE=1 SV=1
126	222	P35244	RPA3	156.69	69	69	66700000	9	9	16	Carbamidomethylation; Acetylation (Protein N-term); Oxidation (M)	13569	Replication protein A 14 kDa subunit OS=Homo sapiens OX=9606 GN=RPA3 PE=1 SV=1
73	107	Q8WWI1	LMO7	156.04	12	12	5540000	18	17	22	Carbamidomethylation	192694	LIM domain only protein 7 OS=Homo sapiens OX=9606 GN=LMO7 PE=1 SV=3
135	94	P49411	TUFM	154.92	36	36	8700000	14	14	15	Carbamidomethylation	49542	Elongation factor Tu mitochondrial OS=Homo sapiens OX=9606 GN=TUFM PE=1 SV=2
190	171	P52907	CAPZA1	154.84	41	41	14700000	7	6	10	Carbamidomethylation; Deamidation (NQ)	32923	F-actin-capping protein subunit alpha-1 OS=Homo sapiens OX=9606 GN=CAPZA1 PE=1 SV=3
119	147	P18124	RPL7	154.83	38	38	27300000	11	11	15	Deamidation (NQ)	29226	60S ribosomal protein L7 OS=Homo sapiens OX=9606 GN=RPL7 PE=1 SV=1
105	154	P06748	NPM1	153.63	43	43	47200000	11	11	17	Carbamidomethylation; Acetylation (Protein N-term); Oxidation (M)	32575	Nucleophosmin OS=Homo sapiens OX=9606 GN=NPM1 PE=1 SV=2
123	95	P42167	TMPO	152.8	35	35	6510000	12	7	14	Carbamidomethylation; Deamidation (NQ)	50670	Lamina-associated polypeptide 2 isoforms beta/gamma OS=Homo sapiens OX=9606 GN=TMPO PE=1 SV=2
131	93	Q5M775	SPECC1	152.55	16	16	4510000	14	14	14	Carbamidomethylation	118585	Cytospin-B OS=Homo sapiens OX=9606 GN=SPECC1 PE=1 SV=1
117	186	P23246	SFPQ	152.15	24	24	11600000	16	15	17	Dimethylation(KR)	76150	Splicing factor proline- and glutamine-rich OS=Homo sapiens OX=9606 GN=SFPQ PE=1 SV=2
160	122	P62241	RPS8	152.01	51	51	24900000	9	9	11	Carbamidomethylation	24205	40S ribosomal protein S8 OS=Homo sapiens OX=9606 GN=RPS8 PE=1 SV=2
91	106	Q08211	DHX9	151.29	16	16	12500000	18	18	20	Carbamidomethylation	140958	ATP-dependent RNA helicase A OS=Homo sapiens OX=9606 GN=DHX9 PE=1 SV=4
204	423	Q8IUE6	HIST2H2AB	150.67	35	35	443000	6	1	9		13995	Histone H2A type 2-B OS=Homo sapiens OX=9606 GN=HIST2H2AB PE=1 SV=3
129	84	P15880	RPS2	149.37	48	48	35900000	13	13	15	Carbamidomethylation; Deamidation (NQ)	31324	40S ribosomal protein S2 OS=Homo sapiens OX=9606 GN=RPS2 PE=1 SV=2
136	162	P62906	RPL10A	149.34	40	40	19900000	10	10	14	Carbamidomethylation	24831	60S ribosomal protein L10a OS=Homo sapiens OX=9606 GN=RPL10A PE=1 SV=2
77	117	P09874	PARP1	148.47	21	21	10700000	20	20	21	Carbamidomethylation	113084	Poly [ADP-ribose] polymerase 1 OS=Homo sapiens OX=9606 GN=PARP1 PE=1 SV=4
106	161	P15927	RPA2	147.22	40	40	85600000	9	9	17	Carbamidomethylation; Oxidation (M); Dehydration; Pyro-glu from Q	29247	Replication protein A 32 kDa subunit OS=Homo sapiens OX=9606 GN=RPA2 PE=1 SV=1
93	130	P06753	TPM3	146.66	35	35	22300000	12	3	18	Deamidation (NQ)	32950	Tropomyosin alpha-3 chain OS=Homo sapiens OX=9606 GN=TPM3 PE=1 SV=2
152	160	P52597	HNRNPF	146.64	27	27	3210000	9	7	11	Carbamidomethylation; Acetylation (Protein N-term)	45672	Heterogeneous nuclear ribonucleoprotein F OS=Homo sapiens OX=9606 GN=HNRNPF PE=1 SV=3
107	250	P62805	HIST1H4A	146.37	52	52	195000000	9	9	17	Oxidation (M)	11367	Histone H4 OS=Homo sapiens OX=9606 GN=HIST1H4A PE=1 SV=2
101	118	Q02878	RPL6	145.59	40	40	21200000	12	11	16	Deamidation (NQ)	32728	60S ribosomal protein L6 OS=Homo sapiens OX=9606 GN=RPL6 PE=1 SV=3
145	169	P09493	TPM1	144.75	27	27	2090000	9	1	12	Methylation(others)	32709	Tropomyosin alpha-1 chain OS=Homo sapiens OX=9606 GN=TPM1 PE=1 SV=2
128	129	P10809	HSPD1	144.37	24	24	10500000	14	14	15	Carbamidomethylation; Deamidation (NQ); Dehydration	61055	60 kDa heat shock protein mitochondrial OS=Homo sapiens OX=9606 GN=HSPD1 PE=1 SV=2
96	120	O00571	DDX3X	144.28	24	24	9030000	16	13	19	Carbamidomethylation; Oxidation (M)	73244	ATP-dependent RNA helicase DDX3X OS=Homo sapiens OX=9606 GN=DDX3X PE=1 SV=3
95	114	P07900	HSP90AA1	143.2	23	23	6290000	16	9	18		84660	Heat shock protein HSP 90-alpha OS=Homo sapiens OX=9606 GN=HSP90AA1 PE=1 SV=5
102	128	P11021	HSPA5	142.58	23	23	4990000	13	11	16	Deamidation (NQ)	72333	Endoplasmic reticulum chaperone BiP OS=Homo sapiens OX=9606 GN=HSPA5 PE=1 SV=2
134	144	P50402	EMD	141.76	44	44	13300000	13	13	15		28994	Emerin OS=Homo sapiens OX=9606 GN=EMD PE=1 SV=1
118	141	P61247	RPS3A	141.51	54	54	18200000	15	15	17	Carbamidomethylation	29945	40S ribosomal protein S3a OS=Homo sapiens OX=9606 GN=RPS3A PE=1 SV=2
171	157	P62140	PPP1CB	140.62	27	27	1800000	8	2	10	Carbamidomethylation	37187	Serine/threonine-protein phosphatase PP1-beta catalytic subunit OS=Homo sapiens OX=9606 GN=PPP1CB PE=1 SV=3
164	165	P62269	RPS18	140.58	48	48	33400000	9	9	12	Deamidation (NQ)	17719	40S ribosomal protein S18 OS=Homo sapiens OX=9606 GN=RPS18 PE=1 SV=3
76	143	Q9UM54	MYO6	140.52	17	17	7520000	19	18	20	Carbamidomethylation	149691	Unconventional myosin-VI OS=Homo sapiens OX=9606 GN=MYO6 PE=1 SV=4
163	418	P17096	HMGA1	140.26	58	58	35300000	6	6	10	Acetylation (K)	11676	High mobility group protein HMG-I/HMG-Y OS=Homo sapiens OX=9606 GN=HMGA1 PE=1 SV=3
177	150	P62136	PPP1CA	140.11	30	30	937000	9	3	11	Carbamidomethylation	37512	Serine/threonine-protein phosphatase PP1-alpha catalytic subunit OS=Homo sapiens OX=9606 GN=PPP1CA PE=1 SV=1
139	116	P60842	EIF4A1	140.02	36	36	8480000	13	11	14	Carbamidomethylation	46154	Eukaryotic initiation factor 4A-I OS=Homo sapiens OX=9606 GN=EIF4A1 PE=1 SV=1
140	112	Q9Y608	LRRFIP2	139.7	19	19	7420000	12	11	13	Carbamidomethylation	82171	Leucine-rich repeat flightless-interacting protein 2 OS=Homo sapiens OX=9606 GN=LRRFIP2 PE=1 SV=1
159	133	P61978	HNRNPK	139.63	30	30	12400000	10	10	10	Carbamidomethylation	50976	Heterogeneous nuclear ribonucleoprotein K OS=Homo sapiens OX=9606 GN=HNRNPK PE=1 SV=1
193	177	P22087	FBL	139.32	31	31	6510000	9	9	9	Carbamidomethylation	33784	rRNA 2'-O-methyltransferase fibrillarin OS=Homo sapiens OX=9606 GN=FBL PE=1 SV=2
146	194	P14649	MYL6B	137.51	33	33	4640000	8	5	14	Carbamidomethylation; Oxidation (M); Deamidation (NQ); Carbamidomethylation (DHKE X@N-term)	22764	Myosin light chain 6B OS=Homo sapiens OX=9606 GN=MYL6B PE=1 SV=1
168	196	P27635	RPL10	136.07	42	42	14000000	8	8	10	Carbamidomethylation; Oxidation (M)	24604	60S ribosomal protein L10 OS=Homo sapiens OX=9606 GN=RPL10 PE=1 SV=4
108	140	Q9NR30	DDX21	135.87	21	21	5230000	16	13	16		87344	Nucleolar RNA helicase 2 OS=Homo sapiens OX=9606 GN=DDX21 PE=1 SV=5
132	145	O94916	NFAT5	135.32	8	8	4730000	10	10	13	Carbamidomethylation	165763	Nuclear factor of activated T-cells 5 OS=Homo sapiens OX=9606 GN=NFAT5 PE=1 SV=1
178	158	P62424	RPL7A	134.89	39	39	18200000	11	11	11	Carbamidomethylation	29996	60S ribosomal protein L7a OS=Homo sapiens OX=9606 GN=RPL7A PE=1 SV=2
143	199	P13639	EEF2	133.87	12	12	3320000	11	11	12	Carbamidomethylation	95338	Elongation factor 2 OS=Homo sapiens OX=9606 GN=EEF2 PE=1 SV=4
155	131	P23396	RPS3	133.76	60	60	20500000	12	12	12	Carbamidomethylation; Oxidation (M)	26688	40S ribosomal protein S3 OS=Homo sapiens OX=9606 GN=RPS3 PE=1 SV=2
224	392	O75531	BANF1	133.5	56	56	71800000	5	5	8	Carbamidomethylation; Oxidation (M)	10059	Barrier-to-autointegration factor OS=Homo sapiens OX=9606 GN=BANF1 PE=1 SV=1
176	146	Q96HS1	PGAM5	132.87	38	38	11600000	11	11	11	Carbamidomethylation	32004	Serine/threonine-protein phosphatase PGAM5 mitochondrial OS=Homo sapiens OX=9606 GN=PGAM5 PE=1 SV=2
70	172	Q09666	AHNAK	131.92	3	3	8720000	18	18	20		629114	Neuroblast differentiation-associated protein AHNAK OS=Homo sapiens OX=9606 GN=AHNAK PE=1 SV=2
154	151	Q13310	PABPC4	131.08	15	15	1550000	9	5	9	Carbamidomethylation; Deamidation (NQ)	70783	Polyadenylate-binding protein 4 OS=Homo sapiens OX=9606 GN=PABPC4 PE=1 SV=1
249	204	P62829	RPL23	130.62	49	49	24300000	6	6	7	Carbamidomethylation	14865	60S ribosomal protein L23 OS=Homo sapiens OX=9606 GN=RPL23 PE=1 SV=1
116	315	P33778	HIST1H2BB	128.83	41	41	5980000	7	2	16	Oxidation (M); Deamidation (NQ); Pyro-glu from E; Pyro-glu from Q	13950	Histone H2B type 1-B OS=Homo sapiens OX=9606 GN=HIST1H2BB PE=1 SV=2
116	314	P23527	HIST1H2BO	128.83	41	41	5980000	7	2	16	Oxidation (M); Deamidation (NQ); Pyro-glu from E; Pyro-glu from Q	13906	Histone H2B type 1-O OS=Homo sapiens OX=9606 GN=HIST1H2BO PE=1 SV=3
116	313	Q16778	HIST2H2BE	128.83	41	41	5980000	7	2	16	Oxidation (M); Deamidation (NQ); Pyro-glu from E; Pyro-glu from Q	13920	Histone H2B type 2-E OS=Homo sapiens OX=9606 GN=HIST2H2BE PE=1 SV=3
116	312	P06899	HIST1H2BJ	128.83	41	41	5980000	7	2	16	Oxidation (M); Deamidation (NQ); Pyro-glu from E; Pyro-glu from Q	13904	Histone H2B type 1-J OS=Homo sapiens OX=9606 GN=HIST1H2BJ PE=1 SV=3
71	205	O75369	FLNB	128.72	9	9	3590000	21	16	23	Carbamidomethylation	278162	Filamin-B OS=Homo sapiens OX=9606 GN=FLNB PE=1 SV=2
169	164	O00567	NOP56	128.19	15	15	3660000	8	8	10	Carbamidomethylation	66050	Nucleolar protein 56 OS=Homo sapiens OX=9606 GN=NOP56 PE=1 SV=4
114	281	Q99879	HIST1H2BM	127.93	41	41	14300000	7	2	16	Oxidation (M); Deamidation (NQ); Pyro-glu from E; Pyro-glu from Q	13989	Histone H2B type 1-M OS=Homo sapiens OX=9606 GN=HIST1H2BM PE=1 SV=3
114	293	P62807	HIST1H2BC	127.93	41	41	14300000	7	2	16	Oxidation (M); Deamidation (NQ); Pyro-glu from E; Pyro-glu from Q	13906	Histone H2B type 1-C/E/F/G/I OS=Homo sapiens OX=9606 GN=HIST1H2BC PE=1 SV=4
114	292	P57053	H2BFS	127.93	41	41	14300000	7	2	16	Oxidation (M); Deamidation (NQ); Pyro-glu from E; Pyro-glu from Q	13944	Histone H2B type F-S OS=Homo sapiens OX=9606 GN=H2BFS PE=1 SV=2
114	291	Q99877	HIST1H2BN	127.93	41	41	14300000	7	2	16	Oxidation (M); Deamidation (NQ); Pyro-glu from E; Pyro-glu from Q	13922	Histone H2B type 1-N OS=Homo sapiens OX=9606 GN=HIST1H2BN PE=1 SV=3
114	290	Q5QNW6	HIST2H2BF	127.93	41	41	14300000	7	2	16	Oxidation (M); Deamidation (NQ); Pyro-glu from E; Pyro-glu from Q	13920	Histone H2B type 2-F OS=Homo sapiens OX=9606 GN=HIST2H2BF PE=1 SV=3
114	289	Q93079	HIST1H2BH	127.93	41	41	14300000	7	2	16	Oxidation (M); Deamidation (NQ); Pyro-glu from E; Pyro-glu from Q	13892	Histone H2B type 1-H OS=Homo sapiens OX=9606 GN=HIST1H2BH PE=1 SV=3
114	288	P58876	HIST1H2BD	127.93	41	41	14300000	7	2	16	Oxidation (M); Deamidation (NQ); Pyro-glu from E; Pyro-glu from Q	13936	Histone H2B type 1-D OS=Homo sapiens OX=9606 GN=HIST1H2BD PE=1 SV=2
114	287	O60814	HIST1H2BK	127.93	41	41	14300000	7	2	16	Oxidation (M); Deamidation (NQ); Pyro-glu from E; Pyro-glu from Q	13890	Histone H2B type 1-K OS=Homo sapiens OX=9606 GN=HIST1H2BK PE=1 SV=3
114	286	Q99880	HIST1H2BL	127.93	41	41	14300000	7	2	16	Oxidation (M); Deamidation (NQ); Pyro-glu from E; Pyro-glu from Q	13952	Histone H2B type 1-L OS=Homo sapiens OX=9606 GN=HIST1H2BL PE=1 SV=3
130	148	P39880	CUX1	127.04	10	10	3240000	14	14	15	Deamidation (NQ)	164187	Homeobox protein cut-like 1 OS=Homo sapiens OX=9606 GN=CUX1 PE=1 SV=3
286	211	P47755	CAPZA2	126.78	33	33	6380000	6	5	6	Carbamidomethylation; Deamidation (NQ)	32949	F-actin-capping protein subunit alpha-2 OS=Homo sapiens OX=9606 GN=CAPZA2 PE=1 SV=3
144	191	P62249	RPS16	126.45	49	49	19300000	10	10	12	Carbamidomethylation; Deamidation (NQ)	16445	40S ribosomal protein S16 OS=Homo sapiens OX=9606 GN=RPS16 PE=1 SV=2
83	182	P11387	TOP1	125.33	23	23	10500000	18	18	22	Carbamidomethylation; Acetylation (Protein N-term)	90726	DNA topoisomerase 1 OS=Homo sapiens OX=9606 GN=TOP1 PE=1 SV=2
246	272	P16401	HIST1H1B	124.82	29	29	23400000	7	5	8	Acetylation (Protein N-term); Deamidation (NQ)	22580	Histone H1.5 OS=Homo sapiens OX=9606 GN=HIST1H1B PE=1 SV=3
161	163	Q00059	TFAM	124.68	37	37	18500000	11	11	12	Carbamidomethylation; Oxidation (M)	29097	Transcription factor A mitochondrial OS=Homo sapiens OX=9606 GN=TFAM PE=1 SV=1
267	189	Q02543	RPL18A	124.58	39	39	10900000	7	7	7	Carbamidomethylation	20762	60S ribosomal protein L18a OS=Homo sapiens OX=9606 GN=RPL18A PE=1 SV=2
255	255	P04406	GAPDH	124.03	21	21	4400000	7	7	7	Carbamidomethylation; Deamidation (NQ)	36053	Glyceraldehyde-3-phosphate dehydrogenase OS=Homo sapiens OX=9606 GN=GAPDH PE=1 SV=3
100	200	P61313	RPL15	123.95	44	44	14700000	12	12	19	Deamidation (NQ); Pyro-glu from Q	24146	60S ribosomal protein L15 OS=Homo sapiens OX=9606 GN=RPL15 PE=1 SV=2
287	221	Q07020	RPL18	123.72	36	36	19400000	6	6	6	Carbamidomethylation	21634	60S ribosomal protein L18 OS=Homo sapiens OX=9606 GN=RPL18 PE=1 SV=2
103	192	Q9UQ35	SRRM2	123.7	5	5	3650000	13	13	14	Carbamidomethylation	299616	Serine/arginine repetitive matrix protein 2 OS=Homo sapiens OX=9606 GN=SRRM2 PE=1 SV=2
156	180	P02533	KRT14	123.65	19	19	759000	9	2	12	Carbamidomethylation; Oxidation (M); Deamidation (NQ)	51562	Keratin type I cytoskeletal 14 OS=Homo sapiens OX=9606 GN=KRT14 PE=1 SV=4
201	170	Q96C19	EFHD2	123.17	37	37	18200000	8	8	9	Carbamidomethylation	26697	EF-hand domain-containing protein D2 OS=Homo sapiens OX=9606 GN=EFHD2 PE=1 SV=1
209	325	P46778	RPL21	121.8	36	36	10700000	6	6	9	Oxidation (M); Deamidation (NQ)	18565	60S ribosomal protein L21 OS=Homo sapiens OX=9606 GN=RPL21 PE=1 SV=2
250	251	P62979	RPS27A	120.85	51	51	15800000	6	6	8	Carbamidomethylation	17965	Ubiquitin-40S ribosomal protein S27a OS=Homo sapiens OX=9606 GN=RPS27A PE=1 SV=2
263	276	P28799	GRN	120.32	9	9	6050000	5	5	6	Carbamidomethylation; Pyro-glu from Q	63545	Progranulin OS=Homo sapiens OX=9606 GN=GRN PE=1 SV=2
200	258	Q07955	SRSF1	120.3	22	22	9180000	7	7	9		27745	Serine/arginine-rich splicing factor 1 OS=Homo sapiens OX=9606 GN=SRSF1 PE=1 SV=2
192	156	P07355	ANXA2	120.2	30	30	7000000	9	9	10	Carbamidomethylation; Acetylation (Protein N-term)	38604	Annexin A2 OS=Homo sapiens OX=9606 GN=ANXA2 PE=1 SV=2
281	369	P62847	RPS24	120.16	35	35	8170000	4	4	7	Acetylation (Protein N-term); Oxidation (M); Pyro-glu from Q	15423	40S ribosomal protein S24 OS=Homo sapiens OX=9606 GN=RPS24 PE=1 SV=1
188	166	Q92786	PROX1	120.03	12	12	3190000	9	9	9	Carbamidomethylation	83203	Prospero homeobox protein 1 OS=Homo sapiens OX=9606 GN=PROX1 PE=1 SV=2
217	263	P61353	RPL27	119.63	42	42	20300000	5	5	8		15798	60S ribosomal protein L27 OS=Homo sapiens OX=9606 GN=RPL27 PE=1 SV=2
337	332	Q01130	SRSF2	119.55	21	21	3190000	5	5	5		25476	Serine/arginine-rich splicing factor 2 OS=Homo sapiens OX=9606 GN=SRSF2 PE=1 SV=4
121	198	Q96RR1	TWNK	119.37	27	27	5820000	14	14	15	Carbamidomethylation; Formylation	77154	Twinkle protein mitochondrial OS=Homo sapiens OX=9606 GN=TWNK PE=1 SV=1
213	190	P40429	RPL13A	119.31	37	37	14700000	8	8	9	Carbamidomethylation; Acetylation (Protein N-term); Oxidation (M)	23577	60S ribosomal protein L13a OS=Homo sapiens OX=9606 GN=RPL13A PE=1 SV=2
300	218	P07737	PFN1	119.15	48	48	4270000	6	6	6	Carbamidomethylation	15054	Profilin-1 OS=Homo sapiens OX=9606 GN=PFN1 PE=1 SV=2
90	202	P49916	LIG3	118.79	17	17	6260000	17	17	17	Carbamidomethylation	112907	DNA ligase 3 OS=Homo sapiens OX=9606 GN=LIG3 PE=1 SV=2
127	483	P07477	PRSS1	118.78	18	18	33300000	7	1	14	Oxidation (M); Deamidation (NQ); Acetylation (N-term); Dimethylation(KR); Propionaldehyde +40; Ammonia-loss (N)	26558	Trypsin-1 OS=Homo sapiens OX=9606 GN=PRSS1 PE=1 SV=1
212	305	P05387	RPLP2	118.47	77	77	22900000	6	6	9	Deamidation (NQ)	11665	60S acidic ribosomal protein P2 OS=Homo sapiens OX=9606 GN=RPLP2 PE=1 SV=1
167	187	Q15233	NONO	118.05	17	17	7370000	10	9	11	Carbamidomethylation	54232	Non-POU domain-containing octamer-binding protein OS=Homo sapiens OX=9606 GN=NONO PE=1 SV=4
248	167	Q15365	PCBP1	117.92	25	25	6870000	8	5	8	Carbamidomethylation	37498	Poly(rC)-binding protein 1 OS=Homo sapiens OX=9606 GN=PCBP1 PE=1 SV=2
157	176	P09327	VIL1	115.95	15	15	2810000	11	11	11	Carbamidomethylation	92695	Villin-1 OS=Homo sapiens OX=9606 GN=VIL1 PE=1 SV=4
202	295	P62888	RPL30	115.55	58	58	20100000	5	5	10	Carbamidomethylation; Deamidation (NQ)	12784	60S ribosomal protein L30 OS=Homo sapiens OX=9606 GN=RPL30 PE=1 SV=2
195	179	P08727	KRT19	115.46	23	23	306000	10	3	10		44106	Keratin type I cytoskeletal 19 OS=Homo sapiens OX=9606 GN=KRT19 PE=1 SV=4
260	244	O00214	LGALS8	114.58	26	26	4470000	7	7	7	Carbamidomethylation; Deamidation (NQ); Biotinylation	35808	Galectin-8 OS=Homo sapiens OX=9606 GN=LGALS8 PE=1 SV=4
321	301	P62899	RPL31	114.04	37	37	12200000	5	5	5		14463	60S ribosomal protein L31 OS=Homo sapiens OX=9606 GN=RPL31 PE=1 SV=1
215	235	P62753	RPS6	113.96	25	25	18000000	6	6	9	Carbamidomethylation; Oxidation (M); Pyro-glu from Q	28681	40S ribosomal protein S6 OS=Homo sapiens OX=9606 GN=RPS6 PE=1 SV=1
184	206	P22626	HNRNPA2B1	113.59	27	27	4060000	9	8	9	Deamidation (NQ)	37430	Heterogeneous nuclear ribonucleoproteins A2/B1 OS=Homo sapiens OX=9606 GN=HNRNPA2B1 PE=1 SV=2
208	252	P18621	RPL17	113	41	41	17200000	6	6	9	Carbamidomethylation	21397	60S ribosomal protein L17 OS=Homo sapiens OX=9606 GN=RPL17 PE=1 SV=3
196	241	P62910	RPL32	112.98	51	51	7730000	7	7	10	Carbamidomethylation; Oxidation (M)	15860	60S ribosomal protein L32 OS=Homo sapiens OX=9606 GN=RPL32 PE=1 SV=2
239	203	P25705	ATP5F1A	112.6	16	16	3370000	8	8	8		59751	ATP synthase subunit alpha mitochondrial OS=Homo sapiens OX=9606 GN=ATP5F1A PE=1 SV=1
268	231	P26373	RPL13	112.31	29	29	22800000	6	6	7	Oxidation (M); Deamidation (NQ)	24261	60S ribosomal protein L13 OS=Homo sapiens OX=9606 GN=RPL13 PE=1 SV=4
282	374	P62851	RPS25	112.25	30	30	12400000	5	5	7	Deamidation (NQ)	13742	40S ribosomal protein S25 OS=Homo sapiens OX=9606 GN=RPS25 PE=1 SV=1
183	185	Q9UDY2	TJP2	112.23	8	8	2480000	9	9	9		133958	Tight junction protein ZO-2 OS=Homo sapiens OX=9606 GN=TJP2 PE=1 SV=2
261	234	P36542	ATP5F1C	112.19	20	20	5090000	6	6	7		32996	ATP synthase subunit gamma mitochondrial OS=Homo sapiens OX=9606 GN=ATP5F1C PE=1 SV=1
158	188	P12268	IMPDH2	112.1	25	25	6630000	11	9	12	Carbamidomethylation	55805	Inosine-5'-monophosphate dehydrogenase 2 OS=Homo sapiens OX=9606 GN=IMPDH2 PE=1 SV=2
197	193	Q16629	SRSF7	111.73	32	32	6350000	8	7	10	Carbamidomethylation	27367	Serine/arginine-rich splicing factor 7 OS=Homo sapiens OX=9606 GN=SRSF7 PE=1 SV=1
317	336	P62917	RPL8	111.42	19	19	11900000	5	5	5		28025	60S ribosomal protein L8 OS=Homo sapiens OX=9606 GN=RPL8 PE=1 SV=2
280	349	Q13951	CBFB	110.79	31	31	5170000	6	6	7	Carbamidomethylation; Deamidation (NQ)	21508	Core-binding factor subunit beta OS=Homo sapiens OX=9606 GN=CBFB PE=1 SV=2
191	228	P62258	YWHAE	110.68	25	25	4090000	6	4	9	Carbamidomethylation; Acetylation (Protein N-term); Oxidation (M)	29174	14-3-3 protein epsilon OS=Homo sapiens OX=9606 GN=YWHAE PE=1 SV=1
214	209	Q14847	LASP1	110.16	27	27	2320000	7	7	9	Carbamidomethylation	29717	LIM and SH3 domain protein 1 OS=Homo sapiens OX=9606 GN=LASP1 PE=1 SV=2
222	245	P62277	RPS13	109.48	45	45	17200000	8	8	8		17222	40S ribosomal protein S13 OS=Homo sapiens OX=9606 GN=RPS13 PE=1 SV=2
227	216	Q13428	TCOF1	109.36	6	6	1460000	8	8	8		152105	Treacle protein OS=Homo sapiens OX=9606 GN=TCOF1 PE=1 SV=3
269	375	P08708	RPS17	108.82	49	49	6630000	5	5	7	Carbamidomethylation	15550	40S ribosomal protein S17 OS=Homo sapiens OX=9606 GN=RPS17 PE=1 SV=2
245	253	P46782	RPS5	108.75	30	30	6370000	6	6	8	Carbamidomethylation	22876	40S ribosomal protein S5 OS=Homo sapiens OX=9606 GN=RPS5 PE=1 SV=4
355	364	P84090	ERH	108.75	44	44	13300000	4	4	4	Carbamidomethylation; Acetylation (Protein N-term)	12259	Enhancer of rudimentary homolog OS=Homo sapiens OX=9606 GN=ERH PE=1 SV=1
243	345	Q9H853	TUBA4B	108.49	22	22	120000	5	1	8	Pyro-glu from Q	27551	Putative tubulin-like protein alpha-4B OS=Homo sapiens OX=9606 GN=TUBA4B PE=5 SV=2
216	238	P62081	RPS7	107.75	34	34	10800000	6	6	6		22127	40S ribosomal protein S7 OS=Homo sapiens OX=9606 GN=RPS7 PE=1 SV=1
185	210	P51114	FXR1	107.61	14	14	3260000	8	6	9	Carbamidomethylation; Deamidation (NQ)	69721	Fragile X mental retardation syndrome-related protein 1 OS=Homo sapiens OX=9606 GN=FXR1 PE=1 SV=3
181	220	Q13501	SQSTM1	107.31	21	21	10700000	7	7	8	Carbamidomethylation; Deamidation (NQ)	47687	Sequestosome-1 OS=Homo sapiens OX=9606 GN=SQSTM1 PE=1 SV=1
274	334	P62750	RPL23A	106.72	32	32	11400000	5	5	6		17695	60S ribosomal protein L23a OS=Homo sapiens OX=9606 GN=RPL23A PE=1 SV=1
137	520	P05976	MYL1	105.59	17	17	549000	4	2	15	Oxidation (M); Deamidation (NQ)	21145	Myosin light chain 1/3 skeletal muscle isoform OS=Homo sapiens OX=9606 GN=MYL1 PE=2 SV=3
229	227	Q9Y2W1	THRAP3	105.23	8	8	1590000	7	7	7		108666	Thyroid hormone receptor-associated protein 3 OS=Homo sapiens OX=9606 GN=THRAP3 PE=1 SV=2
194	217	P46779	RPL28	104.4	48	48	9500000	8	8	9	Carbamidomethylation; Acetylation (Protein N-term); Deamidation (NQ)	15747	60S ribosomal protein L28 OS=Homo sapiens OX=9606 GN=RPL28 PE=1 SV=3
327	370	P35637	FUS	104.38	12	12	6350000	5	5	5		53426	RNA-binding protein FUS OS=Homo sapiens OX=9606 GN=FUS PE=1 SV=1
276	355	P61254	RPL26	104.23	27	27	9760000	4	4	6	Deamidation (NQ); Acetaldehyde +26	17258	60S ribosomal protein L26 OS=Homo sapiens OX=9606 GN=RPL26 PE=1 SV=1
365	434	P62913	RPL11	104.15	25	25	7950000	4	4	4	Carbamidomethylation	20252	60S ribosomal protein L11 OS=Homo sapiens OX=9606 GN=RPL11 PE=1 SV=2
236	262	P04792	HSPB1	103.77	32	32	8370000	7	7	8	Pyro-glu from Q	22783	Heat shock protein beta-1 OS=Homo sapiens OX=9606 GN=HSPB1 PE=1 SV=2
288	398	P18887	XRCC1	103.55	6	6	1400000	4	4	4	Carbamidomethylation	69477	DNA repair protein XRCC1 OS=Homo sapiens OX=9606 GN=XRCC1 PE=1 SV=2
172	197	P27348	YWHAQ	102.64	37	37	1660000	8	4	10	Carbamidomethylation; Oxidation (M)	27764	14-3-3 protein theta OS=Homo sapiens OX=9606 GN=YWHAQ PE=1 SV=1
182	237	P20700	LMNB1	102.64	15	15	3230000	8	8	10	Carbamidomethylation	66408	Lamin-B1 OS=Homo sapiens OX=9606 GN=LMNB1 PE=1 SV=2
180	303	P0DMV9	HSPA1B	102.09	13	13	256000	7	1	10	Carbamidomethylation; Deamidation (NQ)	70052	Heat shock 70 kDa protein 1B OS=Homo sapiens OX=9606 GN=HSPA1B PE=1 SV=1
180	302	P0DMV8	HSPA1A	102.09	13	13	256000	7	1	10	Carbamidomethylation; Deamidation (NQ)	70052	Heat shock 70 kDa protein 1A OS=Homo sapiens OX=9606 GN=HSPA1A PE=1 SV=1
210	282	P04899	GNAI2	101.77	26	26	1560000	7	3	9	Carbamidomethylation	40451	Guanine nucleotide-binding protein G(i) subunit alpha-2 OS=Homo sapiens OX=9606 GN=GNAI2 PE=1 SV=3
251	277	P18077	RPL35A	101.68	53	53	8530000	7	7	8	Oxidation (M); Deamidation (NQ)	12538	60S ribosomal protein L35a OS=Homo sapiens OX=9606 GN=RPL35A PE=1 SV=2
272	261	P10412	HIST1H1E	101.55	29	29	6850000	6	1	7	Acetylation (Protein N-term)	21865	Histone H1.4 OS=Homo sapiens OX=9606 GN=HIST1H1E PE=1 SV=2
138	558	Q8NHM4	PRSS3P2	100.58	17	17	29100000	7	1	12	Carbamidomethylation; Acetylation (N-term); Dimethylation(KR); Propionaldehyde +40; Ammonia-loss (N); Aminotyrosine with sulfation	26537	Putative trypsin-6 OS=Homo sapiens OX=9606 GN=PRSS3P2 PE=5 SV=2
256	365	Q9Y2X3	NOP58	100.4	13	13	2510000	6	5	6	Carbamidomethylation	59578	Nucleolar protein 58 OS=Homo sapiens OX=9606 GN=NOP58 PE=1 SV=1
277	270	Q9HD42	CHMP1A	100.16	25	25	8080000	6	6	6	Acetylation (Protein N-term)	21703	Charged multivesicular body protein 1a OS=Homo sapiens OX=9606 GN=CHMP1A PE=1 SV=1
364	432	P84098	RPL19	99.75	21	21	4740000	4	4	4		23466	60S ribosomal protein L19 OS=Homo sapiens OX=9606 GN=RPL19 PE=1 SV=1
133	275	Q92614	MYO18A	99.61	5	5	2730000	12	12	14	Carbamidomethylation	233113	Unconventional myosin-XVIIIa OS=Homo sapiens OX=9606 GN=MYO18A PE=1 SV=3
166	232	Q9P0K7	RAI14	99.49	9	9	2870000	9	9	11	Carbamidomethylation	110041	Ankycorbin OS=Homo sapiens OX=9606 GN=RAI14 PE=1 SV=2
242	285	P63096	GNAI1	98.59	19	19	398000	6	2	8	Carbamidomethylation	40361	Guanine nucleotide-binding protein G(i) subunit alpha-1 OS=Homo sapiens OX=9606 GN=GNAI1 PE=1 SV=2
334	472	P42677	RPS27	98.07	38	38	8410000	4	4	5	Carbamidomethylation	9461	40S ribosomal protein S27 OS=Homo sapiens OX=9606 GN=RPS27 PE=1 SV=3
189	337	P27708	CAD	97.76	4	4	2880000	8	8	8	Carbamidomethylation; Acetylation (Protein N-term)	242981	CAD protein OS=Homo sapiens OX=9606 GN=CAD PE=1 SV=3
206	362	Q13137	CALCOCO2	97.34	16	16	2290000	8	8	8		52254	Calcium-binding and coiled-coil domain-containing protein 2 OS=Homo sapiens OX=9606 GN=CALCOCO2 PE=1 SV=1
187	260	P40939	HADHA	96.95	13	13	2290000	9	9	9	Carbamidomethylation	83000	Trifunctional enzyme subunit alpha mitochondrial OS=Homo sapiens OX=9606 GN=HADHA PE=1 SV=2
278	297	P19532	TFE3	96.9	11	11	1730000	6	6	7		61521	Transcription factor E3 OS=Homo sapiens OX=9606 GN=TFE3 PE=1 SV=4
342	489	P60866	RPS20	96.56	25	25	6760000	3	3	5	Carbamidomethylation	13373	40S ribosomal protein S20 OS=Homo sapiens OX=9606 GN=RPS20 PE=1 SV=1
373	464	P46776	RPL27A	96.55	21	21	10300000	3	3	3	Carbamidomethylation	16561	60S ribosomal protein L27a OS=Homo sapiens OX=9606 GN=RPL27A PE=1 SV=2
290	278	O94776	MTA2	96.55	9	9	1450000	5	5	5	Carbamidomethylation	75023	Metastasis-associated protein MTA2 OS=Homo sapiens OX=9606 GN=MTA2 PE=1 SV=1
262	257	O43633	CHMP2A	96.36	24	24	3270000	7	7	7	Acetylation (Protein N-term)	25104	Charged multivesicular body protein 2a OS=Homo sapiens OX=9606 GN=CHMP2A PE=1 SV=1
303	346	P62937	PPIA	96.13	25	25	2920000	4	4	5	Carbamidomethylation	18012	Peptidyl-prolyl cis-trans isomerase A OS=Homo sapiens OX=9606 GN=PPIA PE=1 SV=2
304	356	P84103	SRSF3	95.94	26	26	9240000	4	3	6	Deamidation (NQ)	19330	Serine/arginine-rich splicing factor 3 OS=Homo sapiens OX=9606 GN=SRSF3 PE=1 SV=1
218	280	Q13247	SRSF6	95.75	17	17	4060000	6	6	9	Deamidation (NQ); Pyro-glu from Q	39587	Serine/arginine-rich splicing factor 6 OS=Homo sapiens OX=9606 GN=SRSF6 PE=1 SV=2
338	361	Q92769	HDAC2	94.85	12	12	851000	5	3	5		55364	Histone deacetylase 2 OS=Homo sapiens OX=9606 GN=HDAC2 PE=1 SV=2
295	318	P39019	RPS19	94.74	28	28	2770000	4	4	4		16060	40S ribosomal protein S19 OS=Homo sapiens OX=9606 GN=RPS19 PE=1 SV=2
302	343	P30050	RPL12	94.12	33	33	9580000	5	5	6	Carbamidomethylation	17819	60S ribosomal protein L12 OS=Homo sapiens OX=9606 GN=RPL12 PE=1 SV=1
305	456	Q5JNZ5	RPS26P11	93.98	24	24	4220000	4	4	5	Carbamidomethylation	13002	Putative 40S ribosomal protein S26-like 1 OS=Homo sapiens OX=9606 GN=RPS26P11 PE=5 SV=1
305	476	P62854	RPS26	93.98	24	24	4220000	4	4	5	Carbamidomethylation	13015	40S ribosomal protein S26 OS=Homo sapiens OX=9606 GN=RPS26 PE=1 SV=3
371	460	P62266	RPS23	93.98	26	26	4890000	4	4	4		15808	40S ribosomal protein S23 OS=Homo sapiens OX=9606 GN=RPS23 PE=1 SV=3
257	259	P16403	HIST1H1C	92.95	30	30	6850000	6	1	7	Acetylation (Protein N-term)	21365	Histone H1.2 OS=Homo sapiens OX=9606 GN=HIST1H1C PE=1 SV=2
232	309	P43243	MATR3	92.93	9	9	1860000	7	7	7	Carbamidomethylation; Deamidation (NQ)	94623	Matrin-3 OS=Homo sapiens OX=9606 GN=MATR3 PE=1 SV=2
387	440	P50914	RPL14	92.56	15	15	4950000	3	3	3	Carbamidomethylation	23432	60S ribosomal protein L14 OS=Homo sapiens OX=9606 GN=RPL14 PE=1 SV=4
165	379	Q9UKX2	MYH2	92.2	2	2	297000	5	2	10	Carbamidomethylation; Deamidation (NQ); Ammonia-loss (N)	223042	Myosin-2 OS=Homo sapiens OX=9606 GN=MYH2 PE=1 SV=1
241	271	Q06830	PRDX1	91.96	35	35	9650000	6	5	8	Carbamidomethylation	22110	Peroxiredoxin-1 OS=Homo sapiens OX=9606 GN=PRDX1 PE=1 SV=1
273	310	P83731	RPL24	91.93	35	35	6000000	6	6	7	Carbamidomethylation; Pyro-glu from Q	17779	60S ribosomal protein L24 OS=Homo sapiens OX=9606 GN=RPL24 PE=1 SV=1
203	279	P62280	RPS11	91.75	39	39	11000000	6	6	8	Carbamidomethylation	18431	40S ribosomal protein S11 OS=Homo sapiens OX=9606 GN=RPS11 PE=1 SV=3
271	634	P27482	CALML3	91.46	23	23	41000000	3	1	7	Oxidation (M); Methylation(KR)	16891	Calmodulin-like protein 3 OS=Homo sapiens OX=9606 GN=CALML3 PE=1 SV=2
330	414	P62244	RPS15A	90.44	35	35	6010000	5	5	5	Carbamidomethylation	14840	40S ribosomal protein S15a OS=Homo sapiens OX=9606 GN=RPS15A PE=1 SV=2
322	328	P14222	PRF1	90.03	13	13	2010000	5	5	5	Carbamidomethylation	61377	Perforin-1 OS=Homo sapiens OX=9606 GN=PRF1 PE=1 SV=1
258	274	P62879	GNB2	89.53	24	24	2390000	7	3	7	Carbamidomethylation	37331	Guanine nucleotide-binding protein G(I)/G(S)/G(T) subunit beta-2 OS=Homo sapiens OX=9606 GN=GNB2 PE=1 SV=3
211	283	P31946	YWHAB	89.42	24	24	693000	6	2	8	Oxidation (M)	28082	14-3-3 protein beta/alpha OS=Homo sapiens OX=9606 GN=YWHAB PE=1 SV=3
247	308	P63104	YWHAZ	89.03	19	19	450000	5	2	7	Carbamidomethylation; Oxidation (M)	27745	14-3-3 protein zeta/delta OS=Homo sapiens OX=9606 GN=YWHAZ PE=1 SV=1
237	326	Q9NR12	PDLIM7	88.71	18	18	1990000	8	8	8	Carbamidomethylation	49845	PDZ and LIM domain protein 7 OS=Homo sapiens OX=9606 GN=PDLIM7 PE=1 SV=1
234	342	Q9BQG0	MYBBP1A	88.07	5	5	1440000	6	6	6		148854	Myb-binding protein 1A OS=Homo sapiens OX=9606 GN=MYBBP1A PE=1 SV=2
399	452	P13987	CD59	87.45	23	23	2230000	3	3	3	Carbamidomethylation	14177	CD59 glycoprotein OS=Homo sapiens OX=9606 GN=CD59 PE=1 SV=1
233	299	O43143	DHX15	87.44	7	7	1650000	6	6	7	Oxidation (M)	90933	Pre-mRNA-splicing factor ATP-dependent RNA helicase DHX15 OS=Homo sapiens OX=9606 GN=DHX15 PE=1 SV=2
97	497	P01857	IGHG1	87.28	17	17	260000000	5	4	17	Carbamidomethylation; Oxidation (M); Dehydration; N-Succinimidyl-2-morpholine acetate; Deamidation followed by a methylation	36106	Immunoglobulin heavy constant gamma 1 OS=Homo sapiens OX=9606 GN=IGHG1 PE=1 SV=1
323	335	P49207	RPL34	86.48	36	36	11400000	5	5	5	Carbamidomethylation	13293	60S ribosomal protein L34 OS=Homo sapiens OX=9606 GN=RPL34 PE=1 SV=3
226	333	P11388	TOP2A	85.6	5	5	1850000	8	8	8	Carbamidomethylation	174384	DNA topoisomerase 2-alpha OS=Homo sapiens OX=9606 GN=TOP2A PE=1 SV=3
175	348	P46781	RPS9	85.47	31	31	10900000	8	8	8		22591	40S ribosomal protein S9 OS=Homo sapiens OX=9606 GN=RPS9 PE=1 SV=3
170	351	Q13576	IQGAP2	85.02	7	7	2640000	10	10	10	Carbamidomethylation	180577	Ras GTPase-activating-like protein IQGAP2 OS=Homo sapiens OX=9606 GN=IQGAP2 PE=1 SV=4
265	344	P61158	ACTR3	84.7	14	14	2610000	6	6	6	Carbamidomethylation	47371	Actin-related protein 3 OS=Homo sapiens OX=9606 GN=ACTR3 PE=1 SV=3
363	404	O60506	SYNCRIP	84.4	7	7	519000	4	1	4	Carbamidomethylation	69603	Heterogeneous nuclear ribonucleoprotein Q OS=Homo sapiens OX=9606 GN=SYNCRIP PE=1 SV=2
235	319	Q9H444	CHMP4B	84.35	33	33	14700000	8	8	8		24950	Charged multivesicular body protein 4b OS=Homo sapiens OX=9606 GN=CHMP4B PE=1 SV=1
310	409	P11277	SPTB	83.53	2	2	66100	4	1	5	Carbamidomethylation	246466	Spectrin beta chain erythrocytic OS=Homo sapiens OX=9606 GN=SPTB PE=1 SV=5
475	671	P05386	RPLP1	83.01	52	52	12200000	2	2	2	Carbamidomethylation	11514	60S acidic ribosomal protein P1 OS=Homo sapiens OX=9606 GN=RPLP1 PE=1 SV=1
319	437	Q8NC51	SERBP1	83.01	16	16	1780000	5	5	5	Carbamidomethylation	44965	Plasminogen activator inhibitor 1 RNA-binding protein OS=Homo sapiens OX=9606 GN=SERBP1 PE=1 SV=2
275	341	P67809	YBX1	82.83	34	34	4400000	7	7	7		35924	Nuclease-sensitive element-binding protein 1 OS=Homo sapiens OX=9606 GN=YBX1 PE=1 SV=3
361	353	P62826	RAN	82.57	21	21	1720000	4	4	4	Carbamidomethylation; Acetylation (Protein N-term)	24423	GTP-binding nuclear protein Ran OS=Homo sapiens OX=9606 GN=RAN PE=1 SV=3
219	339	Q96IZ0	PAWR	82.26	32	32	3910000	8	8	9		36568	PRKC apoptosis WT1 regulator protein OS=Homo sapiens OX=9606 GN=PAWR PE=1 SV=1
318	397	P26368	U2AF2	82.25	7	7	1210000	4	4	5	Carbamidomethylation; Deamidation (NQ)	53501	Splicing factor U2AF 65 kDa subunit OS=Homo sapiens OX=9606 GN=U2AF2 PE=1 SV=4
279	322	Q15366	PCBP2	82.04	23	23	5200000	7	4	7	Carbamidomethylation	38580	Poly(rC)-binding protein 2 OS=Homo sapiens OX=9606 GN=PCBP2 PE=1 SV=1
380	515	P81605	DCD	81.9	30	30	6580000	4	4	4		11284	Dermcidin OS=Homo sapiens OX=9606 GN=DCD PE=1 SV=2
266	347	P61981	YWHAG	81.81	19	19	750000	5	2	6	Oxidation (M)	28303	14-3-3 protein gamma OS=Homo sapiens OX=9606 GN=YWHAG PE=1 SV=2
360	636	Q9BUA6	MYL10	81.64	8	8	881000	4	1	4		25308	Myosin regulatory light chain 10 OS=Homo sapiens OX=9606 GN=MYL10 PE=2 SV=2
370	443	Q71UI9	H2AFV	81.4	29	29	1700000	4	2	4		13509	Histone H2A.V OS=Homo sapiens OX=9606 GN=H2AFV PE=1 SV=3
370	442	P0C0S5	H2AFZ	81.4	29	29	1700000	4	2	4		13553	Histone H2A.Z OS=Homo sapiens OX=9606 GN=H2AFZ PE=1 SV=2
421	533	Q13547	HDAC1	81.04	7	7	292000	3	1	3		55103	Histone deacetylase 1 OS=Homo sapiens OX=9606 GN=HDAC1 PE=1 SV=1
270	405	Q09028	RBBP4	80.81	14	14	1960000	6	2	7	Carbamidomethylation	47656	Histone-binding protein RBBP4 OS=Homo sapiens OX=9606 GN=RBBP4 PE=1 SV=3
362	371	P55769	SNU13	80.7	34	34	3070000	4	4	4	Carbamidomethylation	14174	NHP2-like protein 1 OS=Homo sapiens OX=9606 GN=SNU13 PE=1 SV=3
301	340	Q9Y3E7	CHMP3	80.33	22	22	3960000	5	5	5	Carbamidomethylation	25073	Charged multivesicular body protein 3 OS=Homo sapiens OX=9606 GN=CHMP3 PE=1 SV=3
307	381	P46013	MKI67	79.91	2	2	1300000	5	5	5		358695	Proliferation marker protein Ki-67 OS=Homo sapiens OX=9606 GN=MKI67 PE=1 SV=2
231	458	P12883	MYH7	79.78	2	2	278000	4	1	9	Carbamidomethylation; Deamidation (NQ); Ammonia-loss (N)	223095	Myosin-7 OS=Homo sapiens OX=9606 GN=MYH7 PE=1 SV=5
285	490	P53814	SMTN	79.16	5	5	1420000	4	4	4	Acetylation (Protein N-term)	99059	Smoothelin OS=Homo sapiens OX=9606 GN=SMTN PE=1 SV=7
314	410	P38159	RBMX	78.88	11	11	2230000	4	4	4		42332	RNA-binding motif protein X chromosome OS=Homo sapiens OX=9606 GN=RBMX PE=1 SV=3
225	445	O95714	HERC2	78.87	1	1	796000	7	7	7	Carbamidomethylation	527234	E3 ubiquitin-protein ligase HERC2 OS=Homo sapiens OX=9606 GN=HERC2 PE=1 SV=2
294	498	Q9P2E9	RRBP1	78.79	3	3	503000	3	3	3		152456	Ribosome-binding protein 1 OS=Homo sapiens OX=9606 GN=RRBP1 PE=1 SV=5
320	466	Q12800	TFCP2	78.14	13	13	1900000	4	4	5	Carbamidomethylation	57256	Alpha-globin transcription factor CP2 OS=Homo sapiens OX=9606 GN=TFCP2 PE=1 SV=2
427	676	Q07021	C1QBP	77.56	10	10	2290000	3	3	3		31362	Complement component 1 Q subcomponent-binding protein mitochondrial OS=Homo sapiens OX=9606 GN=C1QBP PE=1 SV=1
259	354	Q92499	DDX1	77.39	9	9	1070000	6	6	6		82432	ATP-dependent RNA helicase DDX1 OS=Homo sapiens OX=9606 GN=DDX1 PE=1 SV=2
444	602	Q07666	KHDRBS1	77.22	6	6	1300000	2	2	2		48227	KH domain-containing RNA-binding signal transduction-associated protein 1 OS=Homo sapiens OX=9606 GN=KHDRBS1 PE=1 SV=1
230	436	Q04637	EIF4G1	76.87	3	3	1210000	5	5	5		175490	Eukaryotic translation initiation factor 4 gamma 1 OS=Homo sapiens OX=9606 GN=EIF4G1 PE=1 SV=4
351	448	P14625	HSP90B1	75.07	5	5	407000	4	2	4		92469	Endoplasmin OS=Homo sapiens OX=9606 GN=HSP90B1 PE=1 SV=1
306	438	P62263	RPS14	74.97	35	35	8100000	4	4	5		16273	40S ribosomal protein S14 OS=Homo sapiens OX=9606 GN=RPS14 PE=1 SV=3
254	391	Q14204	DYNC1H1	74.88	1	1	782000	6	6	6		532412	Cytoplasmic dynein 1 heavy chain 1 OS=Homo sapiens OX=9606 GN=DYNC1H1 PE=1 SV=5
297	367	P35222	CTNNB1	74.62	7	7	943000	5	5	6		85497	Catenin beta-1 OS=Homo sapiens OX=9606 GN=CTNNB1 PE=1 SV=1
325	358	Q08945	SSRP1	74.52	8	8	1330000	5	5	5	Carbamidomethylation	81075	FACT complex subunit SSRP1 OS=Homo sapiens OX=9606 GN=SSRP1 PE=1 SV=1
292	425	Q04917	YWHAH	74.28	16	16	95000	4	1	5	Oxidation (M)	28219	14-3-3 protein eta OS=Homo sapiens OX=9606 GN=YWHAH PE=1 SV=4
375	478	P63167	DYNLL1	74.16	33	33	824000	3	1	4	Carbamidomethylation	10366	Dynein light chain 1 cytoplasmic OS=Homo sapiens OX=9606 GN=DYNLL1 PE=1 SV=1
404	617	Q9UN86	G3BP2	74.04	5	5	773000	2	2	3		54121	Ras GTPase-activating protein-binding protein 2 OS=Homo sapiens OX=9606 GN=G3BP2 PE=1 SV=2
299	446	Q9Y3I0	RTCB	74.02	10	10	1340000	5	5	5	Pyro-glu from Q	55210	tRNA-splicing ligase RtcB homolog OS=Homo sapiens OX=9606 GN=RTCB PE=1 SV=1
238	492	Q14980	NUMA1	73.87	4	4	910000	6	6	6		238257	Nuclear mitotic apparatus protein 1 OS=Homo sapiens OX=9606 GN=NUMA1 PE=1 SV=2
312	380	Q9NYF8	BCLAF1	73.74	7	7	1660000	5	5	5		106122	Bcl-2-associated transcription factor 1 OS=Homo sapiens OX=9606 GN=BCLAF1 PE=1 SV=2
369	429	Q12792	TWF1	73.63	13	13	1850000	4	4	4	Acetylation (Protein N-term)	40283	Twinfilin-1 OS=Homo sapiens OX=9606 GN=TWF1 PE=1 SV=3
331	426	P51116	FXR2	72.43	6	6	623000	4	2	4		74223	Fragile X mental retardation syndrome-related protein 2 OS=Homo sapiens OX=9606 GN=FXR2 PE=1 SV=2
293	450	P51991	HNRNPA3	71.88	10	10	776000	4	3	5	Carbamidomethylation; Deamidation (NQ)	39595	Heterogeneous nuclear ribonucleoprotein A3 OS=Homo sapiens OX=9606 GN=HNRNPA3 PE=1 SV=2
348	475	P23528	CFL1	71.38	18	18	6760000	3	2	4	Acetylation (Protein N-term)	18502	Cofilin-1 OS=Homo sapiens OX=9606 GN=CFL1 PE=1 SV=3
345	713	Q6QEF8	CORO6	71.21	4	4	483000	4	1	5	Carbamidomethylation	52762	Coronin-6 OS=Homo sapiens OX=9606 GN=CORO6 PE=1 SV=2
494	649	P10599	TXN	71.18	21	21	1290000	2	2	2		11737	Thioredoxin OS=Homo sapiens OX=9606 GN=TXN PE=1 SV=3
332	428	Q8NC56	LEMD2	70.68	8	8	1410000	4	4	4	Carbamidomethylation	56975	LEM domain-containing protein 2 OS=Homo sapiens OX=9606 GN=LEMD2 PE=1 SV=1
298	382	Q9UJS0	SLC25A13	70.37	8	8	1030000	5	5	5	Carbamidomethylation	74176	Calcium-binding mitochondrial carrier protein Aralar2 OS=Homo sapiens OX=9606 GN=SLC25A13 PE=1 SV=2
244	427	P78347	GTF2I	70.12	6	6	1300000	5	5	6	Carbamidomethylation	112416	General transcription factor II-I OS=Homo sapiens OX=9606 GN=GTF2I PE=1 SV=2
339	430	Q15293	RCN1	69.97	12	12	2040000	4	4	4		38890	Reticulocalbin-1 OS=Homo sapiens OX=9606 GN=RCN1 PE=1 SV=1
383	473	Q9Y5B9	SUPT16H	69.97	3	3	1010000	3	3	3		119914	FACT complex subunit SPT16 OS=Homo sapiens OX=9606 GN=SUPT16H PE=1 SV=1
353	424	P55084	HADHB	69.37	9	9	1580000	4	4	4		51294	Trifunctional enzyme subunit beta mitochondrial OS=Homo sapiens OX=9606 GN=HADHB PE=1 SV=3
465	615	P20226	TBP	69.03	6	6	1360000	2	2	2	Carbamidomethylation	37698	TATA-box-binding protein OS=Homo sapiens OX=9606 GN=TBP PE=1 SV=2
386	435	Q8WUM4	PDCD6IP	68.95	3	3	913000	3	3	3		96023	Programmed cell death 6-interacting protein OS=Homo sapiens OX=9606 GN=PDCD6IP PE=1 SV=1
448	674	Q9Y3U8	RPL36	68.07	19	19	5540000	2	2	2		12254	60S ribosomal protein L36 OS=Homo sapiens OX=9606 GN=RPL36 PE=1 SV=3
501	679	P47914	RPL29	68.04	14	14	4630000	2	2	2		17752	60S ribosomal protein L29 OS=Homo sapiens OX=9606 GN=RPL29 PE=1 SV=2
357	431	O43390	HNRNPR	67.82	7	7	0	4	1	4	Carbamidomethylation	70943	Heterogeneous nuclear ribonucleoprotein R OS=Homo sapiens OX=9606 GN=HNRNPR PE=1 SV=1
389	511	P49458	SRP9	67.82	33	33	1330000	3	3	3	Carbamidomethylation	10112	Signal recognition particle 9 kDa protein OS=Homo sapiens OX=9606 GN=SRP9 PE=1 SV=2
341	486	Q9BQ39	DDX50	67.71	6	6	78400	4	1	4		82565	ATP-dependent RNA helicase DDX50 OS=Homo sapiens OX=9606 GN=DDX50 PE=1 SV=1
289	433	Q01196	RUNX1	67.66	13	13	2170000	5	5	6	Carbamidomethylation	48737	Runt-related transcription factor 1 OS=Homo sapiens OX=9606 GN=RUNX1 PE=1 SV=3
414	638	P40937	RFC5	67.39	6	6	150000	2	1	3		38497	Replication factor C subunit 5 OS=Homo sapiens OX=9606 GN=RFC5 PE=1 SV=1
283	453	Q14839	CHD4	66.98	3	3	1740000	6	6	6	Carbamidomethylation	218003	Chromodomain-helicase-DNA-binding protein 4 OS=Homo sapiens OX=9606 GN=CHD4 PE=1 SV=2
309	451	P49327	FASN	66.62	2	2	591000	4	4	5	Deamidation (NQ)	273424	Fatty acid synthase OS=Homo sapiens OX=9606 GN=FASN PE=1 SV=3
352	465	Q92598	HSPH1	66.42	6	6	1330000	4	4	4		96865	Heat shock protein 105 kDa OS=Homo sapiens OX=9606 GN=HSPH1 PE=1 SV=1
344	563	P02794	FTH1	66.26	13	13	1140000	2	2	4		21226	Ferritin heavy chain OS=Homo sapiens OX=9606 GN=FTH1 PE=1 SV=2
228	507	Q14573	ITPR3	65.72	2	2	936000	6	6	6	Carbamidomethylation	304105	Inositol 1 4 5-trisphosphate receptor type 3 OS=Homo sapiens OX=9606 GN=ITPR3 PE=1 SV=2
350	491	Q86V15	CASZ1	65.36	3	3	775000	4	4	4		190068	Zinc finger protein castor homolog 1 OS=Homo sapiens OX=9606 GN=CASZ1 PE=1 SV=4
349	543	Q96PK6	RBM14	65.27	3	3	555000	2	2	2		69492	RNA-binding protein 14 OS=Homo sapiens OX=9606 GN=RBM14 PE=1 SV=2
315	521	P09651	HNRNPA1	65.26	8	8	1220000	3	2	3		38747	Heterogeneous nuclear ribonucleoprotein A1 OS=Homo sapiens OX=9606 GN=HNRNPA1 PE=1 SV=5
366	454	Q86VP1	TAX1BP1	65.18	5	5	1130000	4	4	4		90877	Tax1-binding protein 1 OS=Homo sapiens OX=9606 GN=TAX1BP1 PE=1 SV=2
313	444	Q7L2E3	DHX30	64.69	3	3	559000	4	4	4		133938	ATP-dependent RNA helicase DHX30 OS=Homo sapiens OX=9606 GN=DHX30 PE=1 SV=1
484	588	P26447	S100A4	64.62	19	19	1990000	2	2	2		11729	Protein S100-A4 OS=Homo sapiens OX=9606 GN=S100A4 PE=1 SV=1
333	449	P31689	DNAJA1	64.3	13	13	1510000	5	5	5	Carbamidomethylation	44868	DnaJ homolog subfamily A member 1 OS=Homo sapiens OX=9606 GN=DNAJA1 PE=1 SV=2
391	546	P63244	RACK1	63.97	5	5	777000	2	2	2		35077	Receptor of activated protein C kinase 1 OS=Homo sapiens OX=9606 GN=RACK1 PE=1 SV=3
328	462	P41091	EIF2S3	63.3	8	8	683000	3	3	3	Carbamidomethylation	51110	Eukaryotic translation initiation factor 2 subunit 3 OS=Homo sapiens OX=9606 GN=EIF2S3 PE=1 SV=3
487	608	P32969	RPL9	63.23	17	17	1200000	2	2	2	Carbamidomethylation	21863	60S ribosomal protein L9 OS=Homo sapiens OX=9606 GN=RPL9 PE=1 SV=1
335	500	P06733	ENO1	62.8	10	10	2250000	3	3	3	Carbamidomethylation	47169	Alpha-enolase OS=Homo sapiens OX=9606 GN=ENO1 PE=1 SV=2
367	457	O43684	BUB3	62.68	12	12	775000	4	4	4	Carbamidomethylation	37155	Mitotic checkpoint protein BUB3 OS=Homo sapiens OX=9606 GN=BUB3 PE=1 SV=1
372	461	Q86W92	PPFIBP1	62.5	4	4	894000	4	4	4		114024	Liprin-beta-1 OS=Homo sapiens OX=9606 GN=PPFIBP1 PE=1 SV=2
374	467	P63241	EIF5A	62.24	23	23	1060000	4	4	4	Deamidation (NQ)	16832	Eukaryotic translation initiation factor 5A-1 OS=Homo sapiens OX=9606 GN=EIF5A PE=1 SV=2
408	539	Q9NZI8	IGF2BP1	62.15	6	6	372000	3	2	3		63481	Insulin-like growth factor 2 mRNA-binding protein 1 OS=Homo sapiens OX=9606 GN=IGF2BP1 PE=1 SV=2
420	524	P25398	RPS12	61.92	27	27	1760000	3	3	3	Carbamidomethylation	14515	40S ribosomal protein S12 OS=Homo sapiens OX=9606 GN=RPS12 PE=1 SV=3
518	680	P32119	PRDX2	61.57	11	11	230000	2	1	2		21892	Peroxiredoxin-2 OS=Homo sapiens OX=9606 GN=PRDX2 PE=1 SV=5
488	618	P35268	RPL22	61.48	19	19	3350000	2	2	2		14787	60S ribosomal protein L22 OS=Homo sapiens OX=9606 GN=RPL22 PE=1 SV=2
388	496	Q9UN37	VPS4A	60.34	7	7	311000	3	2	3		48898	Vacuolar protein sorting-associated protein 4A OS=Homo sapiens OX=9606 GN=VPS4A PE=1 SV=1
340	474	Q16576	RBBP7	60.2	11	11	405000	5	1	5	Carbamidomethylation	47820	Histone-binding protein RBBP7 OS=Homo sapiens OX=9606 GN=RBBP7 PE=1 SV=1
343	503	Q13263	TRIM28	59.92	5	5	522000	3	3	3	Carbamidomethylation; Acetylation (Protein N-term)	88550	Transcription intermediary factor 1-beta OS=Homo sapiens OX=9606 GN=TRIM28 PE=1 SV=5
336	508	Q9C075	KRT23	59.76	7	7	119000	3	2	5	Deamidation (NQ)	48131	Keratin type I cytoskeletal 23 OS=Homo sapiens OX=9606 GN=KRT23 PE=1 SV=2
378	556	P26599	PTBP1	59.67	5	5	819000	2	2	2		57221	Polypyrimidine tract-binding protein 1 OS=Homo sapiens OX=9606 GN=PTBP1 PE=1 SV=1
368	485	Q13761	RUNX3	59.21	10	10	1180000	4	4	4		44356	Runt-related transcription factor 3 OS=Homo sapiens OX=9606 GN=RUNX3 PE=1 SV=2
405	499	P61026	RAB10	58.35	16	16	106000	3	1	3		22541	Ras-related protein Rab-10 OS=Homo sapiens OX=9606 GN=RAB10 PE=1 SV=1
485	591	O95816	BAG2	58.2	12	12	1930000	2	2	2	Carbamidomethylation	23772	BAG family molecular chaperone regulator 2 OS=Homo sapiens OX=9606 GN=BAG2 PE=1 SV=1
354	526	Q12906	ILF3	57.66	4	4	977000	3	3	3		95339	Interleukin enhancer-binding factor 3 OS=Homo sapiens OX=9606 GN=ILF3 PE=1 SV=3
385	571	P27824	CANX	57.55	4	4	699000	2	2	3		67568	Calnexin OS=Homo sapiens OX=9606 GN=CANX PE=1 SV=2
390	535	O00425	IGF2BP3	57.44	5	5	188000	3	2	3		63705	Insulin-like growth factor 2 mRNA-binding protein 3 OS=Homo sapiens OX=9606 GN=IGF2BP3 PE=1 SV=2
491	639	P60953	CDC42	56.81	11	11	491000	2	1	2	Carbamidomethylation	21259	Cell division control protein 42 homolog OS=Homo sapiens OX=9606 GN=CDC42 PE=1 SV=2
491	683	P17081	RHOQ	56.81	10	10	491000	2	1	2	Carbamidomethylation	22659	Rho-related GTP-binding protein RhoQ OS=Homo sapiens OX=9606 GN=RHOQ PE=1 SV=2
417	768	P63173	RPL38	56.79	17	17	1460000	2	2	2		8218	60S ribosomal protein L38 OS=Homo sapiens OX=9606 GN=RPL38 PE=1 SV=2
483	573	Q9Y4P3	TBL2	56.59	5	5	594000	2	2	2	Carbamidomethylation	49798	Transducin beta-like protein 2 OS=Homo sapiens OX=9606 GN=TBL2 PE=1 SV=1
395	574	P61513	RPL37A	56.23	22	22	3180000	2	2	3	Carbamidomethylation	10275	60S ribosomal protein L37a OS=Homo sapiens OX=9606 GN=RPL37A PE=1 SV=2
346	525	P46821	MAP1B	55.27	1	1	549000	3	3	3		270632	Microtubule-associated protein 1B OS=Homo sapiens OX=9606 GN=MAP1B PE=1 SV=2
376	534	P62191	PSMC1	55.11	6	6	281000	3	3	3	Carbamidomethylation	49185	26S proteasome regulatory subunit 4 OS=Homo sapiens OX=9606 GN=PSMC1 PE=1 SV=1
437	585	P61160	ACTR2	54.96	7	7	1250000	2	2	2		44761	Actin-related protein 2 OS=Homo sapiens OX=9606 GN=ACTR2 PE=1 SV=1
329	531	P28290	ITPRID2	54.59	4	4	1080000	5	5	5	Carbamidomethylation	138386	Protein ITPRID2 OS=Homo sapiens OX=9606 GN=ITPRID2 PE=1 SV=3
406	514	Q01081	U2AF1	54.48	12	12	1090000	3	3	3	Carbamidomethylation	27872	Splicing factor U2AF 35 kDa subunit OS=Homo sapiens OX=9606 GN=U2AF1 PE=1 SV=3
406	513	P0DN76	U2AF1L5	54.48	12	12	1090000	3	3	3	Carbamidomethylation	27872	Splicing factor U2AF 35 kDa subunit-like protein OS=Homo sapiens OX=9606 GN=U2AF1L5 PE=1 SV=1
490	614	O15027	SEC16A	54.45	1	1	133000	2	2	2		251891	Protein transport protein Sec16A OS=Homo sapiens OX=9606 GN=SEC16A PE=1 SV=4
523	721	P82932	MRPS6	54.31	17	17	836000	2	2	2	Carbamidomethylation	14227	28S ribosomal protein S6 mitochondrial OS=Homo sapiens OX=9606 GN=MRPS6 PE=1 SV=3
506	709	P62316	SNRPD2	53.98	17	17	600000	2	2	2	Carbamidomethylation	13527	Small nuclear ribonucleoprotein Sm D2 OS=Homo sapiens OX=9606 GN=SNRPD2 PE=1 SV=1
469	631	P49368	CCT3	53.94	4	4	425000	2	2	2		60534	T-complex protein 1 subunit gamma OS=Homo sapiens OX=9606 GN=CCT3 PE=1 SV=4
359	512	P19338	NCL	53.45	5	5	946000	4	4	4		76615	Nucleolin OS=Homo sapiens OX=9606 GN=NCL PE=1 SV=3
470	635	P19525	EIF2AK2	53.3	5	5	232000	2	2	2		62094	Interferon-induced double-stranded RNA-activated protein kinase OS=Homo sapiens OX=9606 GN=EIF2AK2 PE=1 SV=2
519	692	Q9NY12	GAR1	53.14	12	12	1360000	2	2	2	Carbamidomethylation	22348	H/ACA ribonucleoprotein complex subunit 1 OS=Homo sapiens OX=9606 GN=GAR1 PE=1 SV=1
416	703	Q9UBI6	GNG12	53.09	38	38	2100000	2	2	3	Deamidation (NQ)	8006	Guanine nucleotide-binding protein G(I)/G(S)/G(O) subunit gamma-12 OS=Homo sapiens OX=9606 GN=GNG12 PE=1 SV=3
311	523	O14639	ABLIM1	52.88	6	6	1930000	4	4	4		87688	Actin-binding LIM protein 1 OS=Homo sapiens OX=9606 GN=ABLIM1 PE=1 SV=3
467	624	Q12905	ILF2	52.74	7	7	1000000	2	2	2		43062	Interleukin enhancer-binding factor 2 OS=Homo sapiens OX=9606 GN=ILF2 PE=1 SV=2
384	493	Q9BUJ2	HNRNPUL1	52.53	5	5	558000	3	3	3	Carbamidomethylation	95739	Heterogeneous nuclear ribonucleoprotein U-like protein 1 OS=Homo sapiens OX=9606 GN=HNRNPUL1 PE=1 SV=2
358	504	O95793	STAU1	52.49	8	8	1350000	4	4	4		63182	Double-stranded RNA-binding protein Staufen homolog 1 OS=Homo sapiens OX=9606 GN=STAU1 PE=1 SV=2
407	528	P51608	MECP2	52.46	9	9	897000	3	3	3		52441	Methyl-CpG-binding protein 2 OS=Homo sapiens OX=9606 GN=MECP2 PE=1 SV=1
443	584	Q9NVP1	DDX18	52.42	3	3	1020000	2	2	2	Carbamidomethylation	75407	ATP-dependent RNA helicase DDX18 OS=Homo sapiens OX=9606 GN=DDX18 PE=1 SV=2
308	557	O75643	SNRNP200	52.09	1	1	355000	3	3	3		244505	U5 small nuclear ribonucleoprotein 200 kDa helicase OS=Homo sapiens OX=9606 GN=SNRNP200 PE=1 SV=2
398	621	P62841	RPS15	51.63	15	15	3000000	2	2	2		17040	40S ribosomal protein S15 OS=Homo sapiens OX=9606 GN=RPS15 PE=1 SV=2
456	570	P42766	RPL35	51.32	15	15	6660000	2	2	2		14551	60S ribosomal protein L35 OS=Homo sapiens OX=9606 GN=RPL35 PE=1 SV=2
381	551	Q7Z2W4	ZC3HAV1	51.25	4	4	418000	3	3	3	Carbamidomethylation	101431	Zinc finger CCCH-type antiviral protein 1 OS=Homo sapiens OX=9606 GN=ZC3HAV1 PE=1 SV=3
424	555	Q96AG4	LRRC59	50.57	14	14	2860000	3	3	3	Deamidation (NQ)	34930	Leucine-rich repeat-containing protein 59 OS=Homo sapiens OX=9606 GN=LRRC59 PE=1 SV=1
392	560	P53990	IST1	50.48	5	5	352000	2	2	2	Carbamidomethylation	39751	IST1 homolog OS=Homo sapiens OX=9606 GN=IST1 PE=1 SV=1
409	542	Q9UHD8	SEPTIN9	50.47	5	5	301000	3	3	3		65402	Septin-9 OS=Homo sapiens OX=9606 GN=SEPTIN9 PE=1 SV=2
423	553	Q9P0L0	VAPA	50.31	14	14	373000	3	3	3		27893	Vesicle-associated membrane protein-associated protein A OS=Homo sapiens OX=9606 GN=VAPA PE=1 SV=3
445	611	P05198	EIF2S1	50.1	3	3	36800	1	1	1		36112	Eukaryotic translation initiation factor 2 subunit 1 OS=Homo sapiens OX=9606 GN=EIF2S1 PE=1 SV=3
505	708	Q7LBR1	CHMP1B	50.05	8	8	1270000	2	2	2		22109	Charged multivesicular body protein 1b OS=Homo sapiens OX=9606 GN=CHMP1B PE=1 SV=1
377	552	O60884	DNAJA2	49.57	10	10	914000	3	3	3	Carbamidomethylation	45746	DnaJ homolog subfamily A member 2 OS=Homo sapiens OX=9606 GN=DNAJA2 PE=1 SV=1
492	646	P14618	PKM	49.36	5	5	867000	2	2	2	Carbamidomethylation	57937	Pyruvate kinase PKM OS=Homo sapiens OX=9606 GN=PKM PE=1 SV=4
410	564	P18085	ARF4	49.35	9	9	921000	2	2	2		20511	ADP-ribosylation factor 4 OS=Homo sapiens OX=9606 GN=ARF4 PE=1 SV=3
464	613	Q9H223	EHD4	49.26	4	4	340000	2	2	2		61175	EH domain-containing protein 4 OS=Homo sapiens OX=9606 GN=EHD4 PE=1 SV=1
422	547	P46783	RPS10	49.08	23	23	1050000	3	3	3		18898	40S ribosomal protein S10 OS=Homo sapiens OX=9606 GN=RPS10 PE=1 SV=1
468	627	Q9Y6M1	IGF2BP2	49.05	4	4	0	2	1	2		66121	Insulin-like growth factor 2 mRNA-binding protein 2 OS=Homo sapiens OX=9606 GN=IGF2BP2 PE=1 SV=2
624	826	Q9UJC5	SH3BGRL2	48.71	13	13	434000	1	1	1		12326	SH3 domain-binding glutamic acid-rich-like protein 2 OS=Homo sapiens OX=9606 GN=SH3BGRL2 PE=1 SV=2
426	568	P59998	ARPC4	48.68	10	10	660000	2	2	2		19667	Actin-related protein 2/3 complex subunit 4 OS=Homo sapiens OX=9606 GN=ARPC4 PE=1 SV=3
400	540	O15143	ARPC1B	48.53	9	9	978000	3	3	3	Carbamidomethylation	40950	Actin-related protein 2/3 complex subunit 1B OS=Homo sapiens OX=9606 GN=ARPC1B PE=1 SV=3
462	601	O15144	ARPC2	48.13	7	7	624000	2	2	2		34333	Actin-related protein 2/3 complex subunit 2 OS=Homo sapiens OX=9606 GN=ARPC2 PE=1 SV=1
347	537	P15924	DSP	47.89	1	1	437000	3	3	3	Carbamidomethylation	331774	Desmoplakin OS=Homo sapiens OX=9606 GN=DSP PE=1 SV=3
503	693	Q13148	TARDBP	47.55	3	3	320000	1	1	1		44740	TAR DNA-binding protein 43 OS=Homo sapiens OX=9606 GN=TARDBP PE=1 SV=1
520	706	Q53EZ4	CEP55	47.22	4	4	288000	2	2	2		54178	Centrosomal protein of 55 kDa OS=Homo sapiens OX=9606 GN=CEP55 PE=1 SV=3
623	823	Q8TBC3	SHKBP1	47.19	2	2	389000	1	1	1	Acetylation (Protein N-term)	76344	SH3KBP1-binding protein 1 OS=Homo sapiens OX=9606 GN=SHKBP1 PE=1 SV=2
403	566	Q00325	SLC25A3	47.03	5	5	1960000	2	2	2		40095	Phosphate carrier protein mitochondrial OS=Homo sapiens OX=9606 GN=SLC25A3 PE=1 SV=2
466	623	Q8IYB3	SRRM1	46.8	2	2	268000	2	2	2		102335	Serine/arginine repetitive matrix protein 1 OS=Homo sapiens OX=9606 GN=SRRM1 PE=1 SV=2
478	707	Q96A32	MYLPF	46.5	10	10	613000	2	1	2		19015	Myosin regulatory light chain 2 skeletal muscle isoform OS=Homo sapiens OX=9606 GN=MYLPF PE=2 SV=1
522	712	Q99733	NAP1L4	46.06	5	5	130000	2	1	2		42823	Nucleosome assembly protein 1-like 4 OS=Homo sapiens OX=9606 GN=NAP1L4 PE=1 SV=1
459	581	Q14919	DRAP1	45.9	8	8	439000	2	2	2	Carbamidomethylation	22350	Dr1-associated corepressor OS=Homo sapiens OX=9606 GN=DRAP1 PE=1 SV=3
521	711	O15145	ARPC3	45.74	12	12	1010000	2	2	2		20547	Actin-related protein 2/3 complex subunit 3 OS=Homo sapiens OX=9606 GN=ARPC3 PE=1 SV=3
394	569	Q06787	FMR1	45.57	3	3	228000	2	1	2		71175	Synaptic functional regulator FMR1 OS=Homo sapiens OX=9606 GN=FMR1 PE=1 SV=1
402	565	Q14444	CAPRIN1	45.49	3	3	1040000	2	2	2		78366	Caprin-1 OS=Homo sapiens OX=9606 GN=CAPRIN1 PE=1 SV=2
620	809	Q9NX58	LYAR	44.7	3	3	0	1	1	1	Carbamidomethylation	43615	Cell growth-regulating nucleolar protein OS=Homo sapiens OX=9606 GN=LYAR PE=1 SV=2
428	719	P04637	TP53	44.67	5	5	599000	2	2	2	Carbamidomethylation	43653	Cellular tumor antigen p53 OS=Homo sapiens OX=9606 GN=TP53 PE=1 SV=4
525	726	P60981	DSTN	44.36	12	12	525000	2	1	2	Carbamidomethylation; Acetylation (Protein N-term)	18506	Destrin OS=Homo sapiens OX=9606 GN=DSTN PE=1 SV=3
453	616	Q9Y224	RTRAF	44.3	4	4	400000	1	1	1		28068	RNA transcription translation and transport factor protein OS=Homo sapiens OX=9606 GN=RTRAF PE=1 SV=1
411	579	P48681	NES	43.96	1	1	323000	1	1	1		177438	Nestin OS=Homo sapiens OX=9606 GN=NES PE=1 SV=2
425	567	Q9Y6X9	MORC2	43.62	3	3	301000	3	3	3		117823	ATPase MORC2 OS=Homo sapiens OX=9606 GN=MORC2 PE=1 SV=2
496	652	P11166	SLC2A1	43.06	4	4	885000	2	2	2		54084	Solute carrier family 2 facilitated glucose transporter member 1 OS=Homo sapiens OX=9606 GN=SLC2A1 PE=1 SV=2
471	645	P62995	TRA2B	42.83	6	6	785000	2	2	2		33666	Transformer-2 protein homolog beta OS=Homo sapiens OX=9606 GN=TRA2B PE=1 SV=1
458	577	Q16695	HIST3H3	42.74	10	10	10100000	2	2	2		15508	Histone H3.1t OS=Homo sapiens OX=9606 GN=HIST3H3 PE=1 SV=3
458	576	Q71DI3	HIST2H3A	42.74	10	10	10100000	2	2	2		15388	Histone H3.2 OS=Homo sapiens OX=9606 GN=HIST2H3A PE=1 SV=3
458	575	P68431	HIST1H3A	42.74	10	10	10100000	2	2	2		15404	Histone H3.1 OS=Homo sapiens OX=9606 GN=HIST1H3A PE=1 SV=2
458	610	P84243	H3F3A	42.74	10	10	10100000	2	2	2		15328	Histone H3.3 OS=Homo sapiens OX=9606 GN=H3F3A PE=1 SV=2
498	659	Q03701	CEBPZ	42.63	2	2	98700	2	2	2		120974	CCAAT/enhancer-binding protein zeta OS=Homo sapiens OX=9606 GN=CEBPZ PE=1 SV=3
457	572	P07305	H1F0	42.63	9	9	653000	2	2	2		20863	Histone H1.0 OS=Homo sapiens OX=9606 GN=H1F0 PE=1 SV=3
472	661	O75351	VPS4B	42.28	5	5	33800	2	1	2		49302	Vacuolar protein sorting-associated protein 4B OS=Homo sapiens OX=9606 GN=VPS4B PE=1 SV=2
524	723	Q86XJ1	GAS2L3	42.25	4	4	185000	2	2	2	Carbamidomethylation	75214	GAS2-like protein 3 OS=Homo sapiens OX=9606 GN=GAS2L3 PE=1 SV=1
693	880	Q9Y2Z0	SUGT1	42.06	3	3	422000	1	1	1	Acetylation (Protein N-term)	41024	Protein SGT1 homolog OS=Homo sapiens OX=9606 GN=SUGT1 PE=1 SV=3
527	738	O75569	PRKRA	42.03	7	7	261000	2	2	2	Carbamidomethylation	34404	Interferon-inducible double-stranded RNA-dependent protein kinase activator A OS=Homo sapiens OX=9606 GN=PRKRA PE=1 SV=1
626	836	Q13200	PSMD2	41.95	1	1	170000	1	1	1		100200	26S proteasome non-ATPase regulatory subunit 2 OS=Homo sapiens OX=9606 GN=PSMD2 PE=1 SV=3
526	737	O43175	PHGDH	41.78	4	4	166000	2	2	2		56651	D-3-phosphoglycerate dehydrogenase OS=Homo sapiens OX=9606 GN=PHGDH PE=1 SV=4
489	625	P51153	RAB13	41.62	11	11	150000	2	1	2		22774	Ras-related protein Rab-13 OS=Homo sapiens OX=9606 GN=RAB13 PE=1 SV=1
452	594	P09496	CLTA	41.62	3	3	379000	1	1	1		27077	Clathrin light chain A OS=Homo sapiens OX=9606 GN=CLTA PE=1 SV=1
495	650	P08865	RPSA	41.61	8	8	1080000	2	2	2	Carbamidomethylation	32854	40S ribosomal protein SA OS=Homo sapiens OX=9606 GN=RPSA PE=1 SV=4
434	589	Q6P2Q9	PRPF8	41.45	1	1	245000	2	2	2		273599	Pre-mRNA-processing-splicing factor 8 OS=Homo sapiens OX=9606 GN=PRPF8 PE=1 SV=2
499	662	Q12965	MYO1E	41.28	2	2	74000	2	1	2		127062	Unconventional myosin-Ie OS=Homo sapiens OX=9606 GN=MYO1E PE=1 SV=2
588	775	Q13418	ILK	40.87	2	2	229000	1	1	1		51419	Integrin-linked protein kinase OS=Homo sapiens OX=9606 GN=ILK PE=1 SV=2
450	578	Q13283	G3BP1	40.69	7	7	744000	2	2	2		52164	Ras GTPase-activating protein-binding protein 1 OS=Homo sapiens OX=9606 GN=G3BP1 PE=1 SV=1
382	580	Q14571	ITPR2	40.46	1	1	79200	2	2	2	Carbamidomethylation	308062	Inositol 1 4 5-trisphosphate receptor type 2 OS=Homo sapiens OX=9606 GN=ITPR2 PE=1 SV=2
528	740	P61163	ACTR1A	40.27	7	7	497000	2	2	2		42614	Alpha-centractin OS=Homo sapiens OX=9606 GN=ACTR1A PE=1 SV=1
694	881	Q9H4L5	OSBPL3	40.22	2	2	127000	1	1	1		101224	Oxysterol-binding protein-related protein 3 OS=Homo sapiens OX=9606 GN=OSBPL3 PE=1 SV=1
504	701	Q14257	RCN2	40.1	3	3	115000	1	1	1		36876	Reticulocalbin-2 OS=Homo sapiens OX=9606 GN=RCN2 PE=1 SV=1
412	586	Q969Q0	RPL36AL	39.61	16	16	2940000	2	2	3	Carbamidomethylation	12469	60S ribosomal protein L36a-like OS=Homo sapiens OX=9606 GN=RPL36AL PE=1 SV=3
412	667	P83881	RPL36A	39.61	16	16	2940000	2	2	3	Carbamidomethylation	12441	60S ribosomal protein L36a OS=Homo sapiens OX=9606 GN=RPL36A PE=1 SV=2
438	607	P42704	LRPPRC	39.31	2	2	1960000	2	2	2	Carbamidomethylation	157904	Leucine-rich PPR motif-containing protein mitochondrial OS=Homo sapiens OX=9606 GN=LRPPRC PE=1 SV=3
473	665	Q8IV63	VRK3	39.04	4	4	244000	2	2	2	Carbamidomethylation	52881	Inactive serine/threonine-protein kinase VRK3 OS=Homo sapiens OX=9606 GN=VRK3 PE=1 SV=2
396	600	Q9UQN3	CHMP2B	39.01	8	8	230000	2	2	2		23907	Charged multivesicular body protein 2b OS=Homo sapiens OX=9606 GN=CHMP2B PE=1 SV=1
413	612	O76021	RSL1D1	38.85	3	3	409000	2	2	2		54973	Ribosomal L1 domain-containing protein 1 OS=Homo sapiens OX=9606 GN=RSL1D1 PE=1 SV=3
584	748	Q9UBF2	COPG2	38.74	1	1	163000	1	1	1		97622	Coatomer subunit gamma-2 OS=Homo sapiens OX=9606 GN=COPG2 PE=1 SV=1
584	834	Q9Y678	COPG1	38.74	1	1	163000	1	1	1		97718	Coatomer subunit gamma-1 OS=Homo sapiens OX=9606 GN=COPG1 PE=1 SV=1
474	666	P21980	TGM2	38.69	2	2	168000	1	1	1	Carbamidomethylation; Deamidation (NQ)	77329	Protein-glutamine gamma-glutamyltransferase 2 OS=Homo sapiens OX=9606 GN=TGM2 PE=1 SV=2
529	751	Q9Y6B6	SAR1B	38.42	10	10	184000	2	2	2		22410	GTP-binding protein SAR1b OS=Homo sapiens OX=9606 GN=SAR1B PE=1 SV=1
529	750	Q9NR31	SAR1A	38.42	10	10	184000	2	2	2		22367	GTP-binding protein SAR1a OS=Homo sapiens OX=9606 GN=SAR1A PE=1 SV=1
460	582	Q15154	PCM1	37.88	1	1	71100	2	2	2	Carbamidomethylation	228542	Pericentriolar material 1 protein OS=Homo sapiens OX=9606 GN=PCM1 PE=1 SV=5
397	620	Q99959	PKP2	37.69	3	3	0	2	2	2		97415	Plakophilin-2 OS=Homo sapiens OX=9606 GN=PKP2 PE=1 SV=2
447	642	Q9NZC9	SMARCAL1	37.42	3	3	301000	2	2	2		105938	SWI/SNF-related matrix-associated actin-dependent regulator of chromatin subfamily A-like protein 1 OS=Homo sapiens OX=9606 GN=SMARCAL1 PE=1 SV=1
439	702	Q8WWM7	ATXN2L	36.83	1	1	176000	1	1	1		113374	Ataxin-2-like protein OS=Homo sapiens OX=9606 GN=ATXN2L PE=1 SV=2
477	691	Q99873	PRMT1	36.76	5	5	438000	2	2	2		42462	Protein arginine N-methyltransferase 1 OS=Homo sapiens OX=9606 GN=PRMT1 PE=1 SV=3
561	668	Q05682	CALD1	36.62	2	2	223000	1	1	1		93231	Caldesmon OS=Homo sapiens OX=9606 GN=CALD1 PE=1 SV=3
532	782	Q15185	PTGES3	36.51	14	14	644000	2	2	2	Carbamidomethylation	18697	Prostaglandin E synthase 3 OS=Homo sapiens OX=9606 GN=PTGES3 PE=1 SV=1
695	895	Q13595	TRA2A	36.41	5	5	533000	1	1	1		32689	Transformer-2 protein homolog alpha OS=Homo sapiens OX=9606 GN=TRA2A PE=1 SV=1
531	765	Q9BZL4	PPP1R12C	36.2	3	3	71300	2	1	2		84881	Protein phosphatase 1 regulatory subunit 12C OS=Homo sapiens OX=9606 GN=PPP1R12C PE=1 SV=1
696	896	P26196	DDX6	36.13	2	2	58900	1	1	1		54417	Probable ATP-dependent RNA helicase DDX6 OS=Homo sapiens OX=9606 GN=DDX6 PE=1 SV=2
563	739	Q9BY43	CHMP4A	35.7	6	6	165000	1	1	1		25098	Charged multivesicular body protein 4a OS=Homo sapiens OX=9606 GN=CHMP4A PE=1 SV=3
697	899	Q3MHD2	LSM12	35.7	5	5	88600	1	1	1		21701	Protein LSM12 homolog OS=Homo sapiens OX=9606 GN=LSM12 PE=1 SV=2
698	900	Q14258	TRIM25	35.57	2	2	133000	1	1	1		70974	E3 ubiquitin/ISG15 ligase TRIM25 OS=Homo sapiens OX=9606 GN=TRIM25 PE=1 SV=2
461	587	P50991	CCT4	35.22	4	4	491000	2	2	2		57924	T-complex protein 1 subunit delta OS=Homo sapiens OX=9606 GN=CCT4 PE=1 SV=4
513	845	P10828	THRB	35.19	2	2	907000	1	1	2		52788	Thyroid hormone receptor beta OS=Homo sapiens OX=9606 GN=THRB PE=1 SV=2
513	930	Q86TJ2	TADA2B	35.19	2	2	907000	1	1	2		48470	Transcriptional adapter 2-beta OS=Homo sapiens OX=9606 GN=TADA2B PE=1 SV=2
513	937	P10827	THRA	35.19	1	1	907000	1	1	2		54816	Thyroid hormone receptor alpha OS=Homo sapiens OX=9606 GN=THRA PE=1 SV=1
446	640	Q9H0D6	XRN2	35.13	3	3	355000	2	2	2		108583	5'-3' exoribonuclease 2 OS=Homo sapiens OX=9606 GN=XRN2 PE=1 SV=1
580	727	Q9UBM7	DHCR7	34.96	2	2	176000	1	1	1		54489	7-dehydrocholesterol reductase OS=Homo sapiens OX=9606 GN=DHCR7 PE=1 SV=1
502	688	P0CW19	LIMS3	34.72	24	24	513000	2	2	2	Carbamidomethylation	13251	LIM and senescent cell antigen-like-containing domain protein 3 OS=Homo sapiens OX=9606 GN=LIMS3 PE=2 SV=1
502	687	P0CW20	LIMS4	34.72	24	24	513000	2	2	2	Carbamidomethylation	13251	LIM and senescent cell antigen-like-containing domain protein 4 OS=Homo sapiens OX=9606 GN=LIMS4 PE=1 SV=1
577	622	Q9NZ01	TECR	34.62	3	3	499000	1	1	1		36034	Very-long-chain enoyl-CoA reductase OS=Homo sapiens OX=9606 GN=TECR PE=1 SV=1
546	733	P49792	RANBP2	34.54	0	0	166000	1	1	1		358201	E3 SUMO-protein ligase RanBP2 OS=Homo sapiens OX=9606 GN=RANBP2 PE=1 SV=2
546	825	Q7Z3J3	RGPD4	34.54	1	1	166000	1	1	1		197287	RanBP2-like and GRIP domain-containing protein 4 OS=Homo sapiens OX=9606 GN=RGPD4 PE=2 SV=3
546	824	A6NKT7	RGPD3	34.54	1	1	166000	1	1	1		197486	RanBP2-like and GRIP domain-containing protein 3 OS=Homo sapiens OX=9606 GN=RGPD3 PE=3 SV=2
546	841	O14715	RGPD8	34.54	1	1	166000	1	1	1		198992	RANBP2-like and GRIP domain-containing protein 8 OS=Homo sapiens OX=9606 GN=RGPD8 PE=1 SV=2
546	840	Q99666	RGPD5	34.54	1	1	166000	1	1	1		198922	RANBP2-like and GRIP domain-containing protein 5/6 OS=Homo sapiens OX=9606 GN=RGPD5 PE=1 SV=3
463	603	O60292	SIPA1L3	34.5	1	1	127000	1	1	1	Carbamidomethylation	194608	Signal-induced proliferation-associated 1-like protein 3 OS=Homo sapiens OX=9606 GN=SIPA1L3 PE=1 SV=3
507	741	Q01658	DR1	34.31	12	12	1490000	2	2	2	Acetylation (Protein N-term)	19444	Protein Dr1 OS=Homo sapiens OX=9606 GN=DR1 PE=1 SV=1
582	735	Q15392	DHCR24	34.12	3	3	156000	1	1	1	Carbamidomethylation	60101	Delta(24)-sterol reductase OS=Homo sapiens OX=9606 GN=DHCR24 PE=1 SV=2
508	746	P17480	UBTF	33.25	1	1	149000	1	1	1		89406	Nucleolar transcription factor 1 OS=Homo sapiens OX=9606 GN=UBTF PE=1 SV=1
699	921	Q15717	ELAVL1	33.17	3	3	210000	1	1	1		36092	ELAV-like protein 1 OS=Homo sapiens OX=9606 GN=ELAVL1 PE=1 SV=2
454	670	Q9Y265	RUVBL1	32.92	3	3	250000	1	1	1		50228	RuvB-like 1 OS=Homo sapiens OX=9606 GN=RUVBL1 PE=1 SV=1
700	931	P04156	PRNP	32.68	5	5	298000	1	1	1		27661	Major prion protein OS=Homo sapiens OX=9606 GN=PRNP PE=1 SV=1
497	653	P37108	SRP14	32.62	6	6	146000	1	1	1		14570	Signal recognition particle 14 kDa protein OS=Homo sapiens OX=9606 GN=SRP14 PE=1 SV=2
701	932	Q9NX24	NHP2	32.56	7	7	838000	1	1	1		17201	H/ACA ribonucleoprotein complex subunit 2 OS=Homo sapiens OX=9606 GN=NHP2 PE=1 SV=1
702	933	P57088	TMEM33	32.26	5	5	111000	1	1	1		27978	Transmembrane protein 33 OS=Homo sapiens OX=9606 GN=TMEM33 PE=1 SV=2
639	986	P56945	BCAR1	32.19	1	1	0	1	1	1		93372	Breast cancer anti-estrogen resistance protein 1 OS=Homo sapiens OX=9606 GN=BCAR1 PE=1 SV=2
703	934	Q6UX53	METTL7B	32.18	4	4	282000	1	1	1		27775	Methyltransferase-like protein 7B OS=Homo sapiens OX=9606 GN=METTL7B PE=1 SV=2
514	850	Q9UJW0	DCTN4	32.02	3	3	1450000	1	1	2		52337	Dynactin subunit 4 OS=Homo sapiens OX=9606 GN=DCTN4 PE=1 SV=1
704	935	P34932	HSPA4	31.96	2	2	76500	1	1	1		94331	Heat shock 70 kDa protein 4 OS=Homo sapiens OX=9606 GN=HSPA4 PE=1 SV=4
500	664	A8MWD9	SNRPGP15	31.88	25	25	230000	2	2	2		8544	Putative small nuclear ribonucleoprotein G-like protein 15 OS=Homo sapiens OX=9606 GN=SNRPGP15 PE=5 SV=2
500	663	P62308	SNRPG	31.88	25	25	230000	2	2	2		8496	Small nuclear ribonucleoprotein G OS=Homo sapiens OX=9606 GN=SNRPG PE=1 SV=1
533	914	P78362	SRPK2	31.81	1	1	230000	1	1	1		77527	SRSF protein kinase 2 OS=Homo sapiens OX=9606 GN=SRPK2 PE=1 SV=3
587	770	P55072	VCP	31.78	1	1	304000	1	1	1		89322	Transitional endoplasmic reticulum ATPase OS=Homo sapiens OX=9606 GN=VCP PE=1 SV=4
476	675	Q8IWS0	PHF6	31.72	4	4	130000	1	1	1		41290	PHD finger protein 6 OS=Homo sapiens OX=9606 GN=PHF6 PE=1 SV=1
618	794	P36957	DLST	31.6	3	3	265000	1	1	1		48755	Dihydrolipoyllysine-residue succinyltransferase component of 2-oxoglutarate dehydrogenase complex mitochondrial OS=Homo sapiens OX=9606 GN=DLST PE=1 SV=4
534	957	P55884	EIF3B	31.28	1	1	285000	1	1	1		92482	Eukaryotic translation initiation factor 3 subunit B OS=Homo sapiens OX=9606 GN=EIF3B PE=1 SV=3
627	839	O60832	DKC1	31.26	2	2	363000	1	1	1		57674	H/ACA ribonucleoprotein complex subunit DKC1 OS=Homo sapiens OX=9606 GN=DKC1 PE=1 SV=3
705	952	Q9Y5J1	UTP18	31.13	3	3	150000	1	1	1		62004	U3 small nucleolar RNA-associated protein 18 homolog OS=Homo sapiens OX=9606 GN=UTP18 PE=1 SV=3
589	779	P35251	RFC1	31.05	1	1	92200	1	1	1	Carbamidomethylation	128254	Replication factor C subunit 1 OS=Homo sapiens OX=9606 GN=RFC1 PE=1 SV=4
535	967	P46777	RPL5	31.01	4	4	248000	1	1	1		34363	60S ribosomal protein L5 OS=Homo sapiens OX=9606 GN=RPL5 PE=1 SV=3
440	745	Q2VIQ3	KIF4B	30.99	1	1	159000	1	1	1		140035	Chromosome-associated kinesin KIF4B OS=Homo sapiens OX=9606 GN=KIF4B PE=2 SV=2
440	758	O95239	KIF4A	30.99	1	1	159000	1	1	1		139881	Chromosome-associated kinesin KIF4A OS=Homo sapiens OX=9606 GN=KIF4A PE=1 SV=3
578	710	Q27J81	INF2	30.95	1	1	170000	1	1	1		135624	Inverted formin-2 OS=Homo sapiens OX=9606 GN=INF2 PE=1 SV=2
625	833	Q99626	CDX2	30.93	3	3	76800	1	1	1		33520	Homeobox protein CDX-2 OS=Homo sapiens OX=9606 GN=CDX2 PE=1 SV=3
625	959	P47902	CDX1	30.93	3	3	76800	1	1	1		28138	Homeobox protein CDX-1 OS=Homo sapiens OX=9606 GN=CDX1 PE=1 SV=2
625	960	O14627	CDX4	30.93	3	3	76800	1	1	1		30480	Homeobox protein CDX-4 OS=Homo sapiens OX=9606 GN=CDX4 PE=1 SV=1
706	953	Q9Y3Y2	CHTOP	30.9	5	5	216000	1	1	1		26397	Chromatin target of PRMT1 protein OS=Homo sapiens OX=9606 GN=CHTOP PE=1 SV=2
431	956	Q5VWZ2	LYPLAL1	30.85	4	4	2420000	1	1	3	Deamidation (NQ)	26316	Lysophospholipase-like protein 1 OS=Homo sapiens OX=9606 GN=LYPLAL1 PE=1 SV=3
449	759	O95425	SVIL	30.81	1	1	187000	1	1	1		247744	Supervillin OS=Homo sapiens OX=9606 GN=SVIL PE=1 SV=2
510	796	P62633	CNBP	30.79	5	5	57800	1	1	2	Carbamidomethylation	19463	Cellular nucleic acid-binding protein OS=Homo sapiens OX=9606 GN=CNBP PE=1 SV=1
707	955	Q7L5D6	GET4	30.78	4	4	141000	1	1	1	Acetylation (Protein N-term)	36504	Golgi to ER traffic protein 4 homolog OS=Homo sapiens OX=9606 GN=GET4 PE=1 SV=1
708	961	Q8N9N5	BANP	30.51	3	3	53200	1	1	1		56494	Protein BANP OS=Homo sapiens OX=9606 GN=BANP PE=1 SV=3
586	764	P14866	HNRNPL	30.34	2	2	0	1	1	1		64133	Heterogeneous nuclear ribonucleoprotein L OS=Homo sapiens OX=9606 GN=HNRNPL PE=1 SV=2
617	793	Q9BPX5	ARPC5L	30.27	8	8	254000	1	1	1		16941	Actin-related protein 2/3 complex subunit 5-like protein OS=Homo sapiens OX=9606 GN=ARPC5L PE=1 SV=1
710	994	O95630	STAMBP	29.95	2	2	101000	1	1	1		48077	STAM-binding protein OS=Homo sapiens OX=9606 GN=STAMBP PE=1 SV=1
554	753	Q9P2D1	CHD7	29.86	0	0	46200	1	1	1		335928	Chromodomain-helicase-DNA-binding protein 7 OS=Homo sapiens OX=9606 GN=CHD7 PE=1 SV=3
592	797	O00139	KIF2A	29.78	1	1	50000	1	1	1		79955	Kinesin-like protein KIF2A OS=Homo sapiens OX=9606 GN=KIF2A PE=1 SV=3
581	734	Q15424	SAFB	29.78	1	1	97700	1	1	1		102642	Scaffold attachment factor B1 OS=Homo sapiens OX=9606 GN=SAFB PE=1 SV=4
479	821	P07910	HNRNPC	29.75	3	3	1610000	1	1	1		33670	Heterogeneous nuclear ribonucleoproteins C1/C2 OS=Homo sapiens OX=9606 GN=HNRNPC PE=1 SV=4
480	891	Q9UG63	ABCF2	29.66	2	2	152000	1	1	1	Deamidation (NQ)	71290	ATP-binding cassette sub-family F member 2 OS=Homo sapiens OX=9606 GN=ABCF2 PE=1 SV=2
636	974	P06312	IGKV4-1	29.24	8	8	676000	1	1	1		13380	Immunoglobulin kappa variable 4-1 OS=Homo sapiens OX=9606 GN=IGKV4-1 PE=1 SV=1
619	806	P98171	ARHGAP4	29.17	2	2	194000	1	1	1		105026	Rho GTPase-activating protein 4 OS=Homo sapiens OX=9606 GN=ARHGAP4 PE=1 SV=2
629	778	Q08431	MFGE8	29.01	2	2	164000	1	1	1		43105	Lactadherin OS=Homo sapiens OX=9606 GN=MFGE8 PE=1 SV=3
583	736	P50454	SERPINH1	28.8	3	3	435000	1	1	1		46441	Serpin H1 OS=Homo sapiens OX=9606 GN=SERPINH1 PE=1 SV=2
709	990	Q14157	UBAP2L	28.53	1	1	62900	1	1	1		114534	Ubiquitin-associated protein 2-like OS=Homo sapiens OX=9606 GN=UBAP2L PE=1 SV=2
628	844	P63208	SKP1	28.34	5	5	398000	1	1	1	Carbamidomethylation	18658	S-phase kinase-associated protein 1 OS=Homo sapiens OX=9606 GN=SKP1 PE=1 SV=2
712	1002	P43487	RANBP1	28.13	5	5	86900	1	1	1		23310	Ran-specific GTPase-activating protein OS=Homo sapiens OX=9606 GN=RANBP1 PE=1 SV=1
630	851	Q9Y3B7	MRPL11	28.09	5	5	121000	1	1	1		20683	39S ribosomal protein L11 mitochondrial OS=Homo sapiens OX=9606 GN=MRPL11 PE=1 SV=1
455	783	Q14974	KPNB1	27.84	1	1	131000	1	1	2		97170	Importin subunit beta-1 OS=Homo sapiens OX=9606 GN=KPNB1 PE=1 SV=2
622	818	O43852	CALU	27.7	3	3	113000	1	1	1		37107	Calumenin OS=Homo sapiens OX=9606 GN=CALU PE=1 SV=2
568	817	Q8TF72	SHROOM3	27.57	0	0	15200000	1	1	1		216856	Protein Shroom3 OS=Homo sapiens OX=9606 GN=SHROOM3 PE=1 SV=2
713	1009	P36402	TCF7	27.57	3	3	480000	1	1	1		41642	Transcription factor 7 OS=Homo sapiens OX=9606 GN=TCF7 PE=1 SV=3
713	1010	Q9UJU2	LEF1	27.57	3	3	480000	1	1	1		44201	Lymphoid enhancer-binding factor 1 OS=Homo sapiens OX=9606 GN=LEF1 PE=1 SV=1
713	1011	Q9HCS4	TCF7L1	27.57	2	2	480000	1	1	1		62631	Transcription factor 7-like 1 OS=Homo sapiens OX=9606 GN=TCF7L1 PE=2 SV=1
713	1012	Q9NQB0	TCF7L2	27.57	2	2	480000	1	1	1		67919	Transcription factor 7-like 2 OS=Homo sapiens OX=9606 GN=TCF7L2 PE=1 SV=2
714	1016	Q9H0S4	DDX47	27.55	3	3	214000	1	1	1		50647	Probable ATP-dependent RNA helicase DDX47 OS=Homo sapiens OX=9606 GN=DDX47 PE=1 SV=1
596	808	Q9Y230	RUVBL2	27.13	2	2	316000	1	1	1	Carbamidomethylation	51157	RuvB-like 2 OS=Homo sapiens OX=9606 GN=RUVBL2 PE=1 SV=3
621	810	P62318	SNRPD3	27.08	8	8	505000	1	1	1		13916	Small nuclear ribonucleoprotein Sm D3 OS=Homo sapiens OX=9606 GN=SNRPD3 PE=1 SV=1
590	785	P55265	ADAR	27.07	1	1	0	1	1	1		136066	Double-stranded RNA-specific adenosine deaminase OS=Homo sapiens OX=9606 GN=ADAR PE=1 SV=4
562	716	P48059	LIMS1	27.03	2	2	6470000	1	1	1		37251	LIM and senescent cell antigen-like-containing domain protein 1 OS=Homo sapiens OX=9606 GN=LIMS1 PE=1 SV=4
633	929	P82663	MRPS25	27.01	6	6	31000	1	1	1		20116	28S ribosomal protein S25 mitochondrial OS=Homo sapiens OX=9606 GN=MRPS25 PE=1 SV=1
632	898	Q15025	TNIP1	26.5	2	2	123000	1	1	1		71864	TNFAIP3-interacting protein 1 OS=Homo sapiens OX=9606 GN=TNIP1 PE=1 SV=2
715	1023	O75323	NIPSNAP2	26.38	3	3	154000	1	1	1		33743	Protein NipSnap homolog 2 OS=Homo sapiens OX=9606 GN=NIPSNAP2 PE=1 SV=1
631	872	P09382	LGALS1	25.92	6	6	259000	1	1	1		14716	Galectin-1 OS=Homo sapiens OX=9606 GN=LGALS1 PE=1 SV=2
595	803	Q13330	MTA1	25.92	1	1	126000	1	1	1	Carbamidomethylation	80786	Metastasis-associated protein MTA1 OS=Homo sapiens OX=9606 GN=MTA1 PE=1 SV=2
595	965	Q9BTC8	MTA3	25.92	2	2	126000	1	1	1	Carbamidomethylation	67504	Metastasis-associated protein MTA3 OS=Homo sapiens OX=9606 GN=MTA3 PE=1 SV=2
593	798	Q99549	MPHOSPH8	25.84	1	1	0	1	1	1	Oxidation (M)	97182	M-phase phosphoprotein 8 OS=Homo sapiens OX=9606 GN=MPHOSPH8 PE=1 SV=2
717	1039	Q14192	FHL2	25.84	3	3	87800	1	1	1	Carbamidomethylation	32193	Four and a half LIM domains protein 2 OS=Homo sapiens OX=9606 GN=FHL2 PE=1 SV=3
718	1042	P61964	WDR5	25.65	4	4	128000	1	1	1		36589	WD repeat-containing protein 5 OS=Homo sapiens OX=9606 GN=WDR5 PE=1 SV=1
566	795	Q15811	ITSN1	25.59	0	0	380000	1	1	1		195420	Intersectin-1 OS=Homo sapiens OX=9606 GN=ITSN1 PE=1 SV=3
566	993	Q9NZM3	ITSN2	25.59	0	0	380000	1	1	1		193460	Intersectin-2 OS=Homo sapiens OX=9606 GN=ITSN2 PE=1 SV=3
591	789	P43403	ZAP70	25.56	2	2	120000	1	1	1		69872	Tyrosine-protein kinase ZAP-70 OS=Homo sapiens OX=9606 GN=ZAP70 PE=1 SV=1
564	742	P30101	PDIA3	25.53	2	2	85300	1	1	1		56782	Protein disulfide-isomerase A3 OS=Homo sapiens OX=9606 GN=PDIA3 PE=1 SV=4
635	966	Q9Y3F4	STRAP	25.47	4	4	222000	1	1	1		38438	Serine-threonine kinase receptor-associated protein OS=Homo sapiens OX=9606 GN=STRAP PE=1 SV=1
550	669	P26641	EEF1G	25.33	2	2	59100	1	1	1		50119	Elongation factor 1-gamma OS=Homo sapiens OX=9606 GN=EEF1G PE=1 SV=3
565	777	Q6PKG0	LARP1	24.92	1	1	40200	1	1	1		123510	La-related protein 1 OS=Homo sapiens OX=9606 GN=LARP1 PE=1 SV=2
598	980	Q9Y446	PKP3	24.89	1	1	0	1	1	1		87082	Plakophilin-3 OS=Homo sapiens OX=9606 GN=PKP3 PE=1 SV=1
638	984	Q5SW79	CEP170	24.68	1	1	59000	1	1	1		175292	Centrosomal protein of 170 kDa OS=Homo sapiens OX=9606 GN=CEP170 PE=1 SV=1
720	1065	Q15056	EIF4H	24.44	4	4	47400	1	1	1		27385	Eukaryotic translation initiation factor 4H OS=Homo sapiens OX=9606 GN=EIF4H PE=1 SV=5
634	962	P85037	FOXK1	24.43	2	2	55000	1	1	1	Carbamidomethylation	75457	Forkhead box protein K1 OS=Homo sapiens OX=9606 GN=FOXK1 PE=1 SV=1
643	1025	P33993	MCM7	24.36	1	1	450000	1	1	1		81308	DNA replication licensing factor MCM7 OS=Homo sapiens OX=9606 GN=MCM7 PE=1 SV=4
640	1005	O15371	EIF3D	24.23	1	1	90000	1	1	1		63973	Eukaryotic translation initiation factor 3 subunit D OS=Homo sapiens OX=9606 GN=EIF3D PE=1 SV=1
724	1076	Q15388	TOMM20	23.84	5	5	347000	1	1	1		16298	Mitochondrial import receptor subunit TOM20 homolog OS=Homo sapiens OX=9606 GN=TOMM20 PE=1 SV=1
721	1070	Q9BYN8	MRPS26	23.82	5	5	132000	1	1	1		24212	28S ribosomal protein S26 mitochondrial OS=Homo sapiens OX=9606 GN=MRPS26 PE=1 SV=1
641	1017	Q96EY7	PTCD3	23.75	1	1	105000	1	1	1		78550	Pentatricopeptide repeat domain-containing protein 3 mitochondrial OS=Homo sapiens OX=9606 GN=PTCD3 PE=1 SV=3
725	1077	P43405	SYK	23.72	1	1	131000	1	1	1	Carbamidomethylation	72066	Tyrosine-protein kinase SYK OS=Homo sapiens OX=9606 GN=SYK PE=1 SV=1
722	1073	Q92945	KHSRP	23.68	2	2	135000	1	1	1		73115	Far upstream element-binding protein 2 OS=Homo sapiens OX=9606 GN=KHSRP PE=1 SV=4
723	1075	Q86WJ1	CHD1L	23.59	2	2	114000	1	1	1		101000	Chromodomain-helicase-DNA-binding protein 1-like OS=Homo sapiens OX=9606 GN=CHD1L PE=1 SV=3
644	1032	O43809	NUDT21	23.45	4	4	97600	1	1	1		26227	Cleavage and polyadenylation specificity factor subunit 5 OS=Homo sapiens OX=9606 GN=NUDT21 PE=1 SV=1
597	832	Q1XH10	SKIDA1	23.43	1	1	0	1	1	1		98148	SKI/DACH domain-containing protein 1 OS=Homo sapiens OX=9606 GN=SKIDA1 PE=1 SV=2
727	1088	P42765	ACAA2	23.38	2	2	31400	1	1	1		41924	3-ketoacyl-CoA thiolase mitochondrial OS=Homo sapiens OX=9606 GN=ACAA2 PE=1 SV=2
555	804	Q14134	TRIM29	23.2	1	1	127000	1	1	1		65835	Tripartite motif-containing protein 29 OS=Homo sapiens OX=9606 GN=TRIM29 PE=1 SV=2
646	1053	P40938	RFC3	23.1	4	4	136000	1	1	1		40556	Replication factor C subunit 3 OS=Homo sapiens OX=9606 GN=RFC3 PE=1 SV=2
728	1125	Q9BR76	CORO1B	22.48	2	2	136000	1	1	1		54235	Coronin-1B OS=Homo sapiens OX=9606 GN=CORO1B PE=1 SV=1
585	755	Q13243	SRSF5	22.41	3	3	59600	1	1	1		31264	Serine/arginine-rich splicing factor 5 OS=Homo sapiens OX=9606 GN=SRSF5 PE=1 SV=1
602	1098	Q92900	UPF1	22.22	1	1	139000	1	1	1		124345	Regulator of nonsense transcripts 1 OS=Homo sapiens OX=9606 GN=UPF1 PE=1 SV=2
732	1138	Q8NHJ6	LILRB4	22.18	2	2	245000	1	1	1		49356	Leukocyte immunoglobulin-like receptor subfamily B member 4 OS=Homo sapiens OX=9606 GN=LILRB4 PE=1 SV=3
729	1132	P60174	TPI1	22.17	5	5	113000	1	1	1		30791	Triosephosphate isomerase OS=Homo sapiens OX=9606 GN=TPI1 PE=1 SV=3
652	1102	O00411	POLRMT	22.05	1	1	82900	1	1	1	Carbamidomethylation	138620	DNA-directed RNA polymerase mitochondrial OS=Homo sapiens OX=9606 GN=POLRMT PE=1 SV=2
730	1135	Q6I9Y2	THOC7	21.99	11	11	0	1	1	1	Carbamidomethylation; Deamidation (NQ)	23743	THO complex subunit 7 homolog OS=Homo sapiens OX=9606 GN=THOC7 PE=1 SV=3
571	893	Q9C0C2	TNKS1BP1	21.98	1	1	74600	1	1	1		181795	182 kDa tankyrase-1-binding protein OS=Homo sapiens OX=9606 GN=TNKS1BP1 PE=1 SV=4
653	1103	Q9Y5S1	TRPV2	21.97	1	1	48200	1	1	1	Carbamidomethylation	85981	Transient receptor potential cation channel subfamily V member 2 OS=Homo sapiens OX=9606 GN=TRPV2 PE=1 SV=1
731	1136	Q99848	EBNA1BP2	21.88	3	3	113000	1	1	1		34852	Probable rRNA-processing protein EBP2 OS=Homo sapiens OX=9606 GN=EBNA1BP2 PE=1 SV=2
569	849	Q13472	TOP3A	21.79	1	1	176000	1	1	1		112372	DNA topoisomerase 3-alpha OS=Homo sapiens OX=9606 GN=TOP3A PE=1 SV=1
650	1092	P54198	HIRA	21.67	1	1	0	1	1	1	Carbamidomethylation	111835	Protein HIRA OS=Homo sapiens OX=9606 GN=HIRA PE=1 SV=2
552	879	Q86V48	LUZP1	21.66	1	1	156000	1	1	1		120275	Leucine zipper protein 1 OS=Homo sapiens OX=9606 GN=LUZP1 PE=1 SV=2
733	1140	Q9NPE3	NOP10	21.63	12	12	259000	1	1	1		7706	H/ACA ribonucleoprotein complex subunit 3 OS=Homo sapiens OX=9606 GN=NOP10 PE=1 SV=1
651	1101	Q13772	NCOA4	21.57	2	2	205000	1	1	1		69726	Nuclear receptor coactivator 4 OS=Homo sapiens OX=9606 GN=NCOA4 PE=1 SV=1
601	1084	O43670	ZNF207	21.55	3	3	285000	1	1	1		50751	BUB3-interacting and GLEBS motif-containing protein ZNF207 OS=Homo sapiens OX=9606 GN=ZNF207 PE=1 SV=1
603	1100	O60313	OPA1	21.54	1	1	0	1	1	1		111630	Dynamin-like 120 kDa protein mitochondrial OS=Homo sapiens OX=9606 GN=OPA1 PE=1 SV=3
517	1080	Q9NZZ3	CHMP5	21.45	7	7	347000	1	1	1	Carbamidomethylation	24571	Charged multivesicular body protein 5 OS=Homo sapiens OX=9606 GN=CHMP5 PE=1 SV=1
544	1126	Q8NB49	ATP11C	21.39	1	1	200000	1	1	1		129477	Phospholipid-transporting ATPase IG OS=Homo sapiens OX=9606 GN=ATP11C PE=1 SV=3
734	1142	O95782	AP2A1	21.36	1	1	26700	1	1	1		107546	AP-2 complex subunit alpha-1 OS=Homo sapiens OX=9606 GN=AP2A1 PE=1 SV=3
599	1038	Q9BYB0	SHANK3	21.29	0	0	272000	1	1	1		184666	SH3 and multiple ankyrin repeat domains protein 3 OS=Homo sapiens OX=9606 GN=SHANK3 PE=1 SV=3
579	722	O94906	PRPF6	21.26	1	1	77600	1	1	1		106925	Pre-mRNA-processing factor 6 OS=Homo sapiens OX=9606 GN=PRPF6 PE=1 SV=1
570	857	Q9UKM9	RALY	21.25	3	3	1720000	1	1	1		32463	RNA-binding protein Raly OS=Homo sapiens OX=9606 GN=RALY PE=1 SV=1
735	1149	P48556	PSMD8	21.14	3	3	28100	1	1	1		39612	26S proteasome non-ATPase regulatory subunit 8 OS=Homo sapiens OX=9606 GN=PSMD8 PE=1 SV=2
739	1165	O00327	ARNTL	21.08	1	1	184000	1	1	1		68762	Aryl hydrocarbon receptor nuclear translocator-like protein 1 OS=Homo sapiens OX=9606 GN=ARNTL PE=1 SV=2
656	1133	Q5D862	FLG2	20.92	0	0	162000	1	1	1		248072	Filaggrin-2 OS=Homo sapiens OX=9606 GN=FLG2 PE=1 SV=1
737	1162	P25205	MCM3	20.87	1	1	120000	1	1	1		90981	DNA replication licensing factor MCM3 OS=Homo sapiens OX=9606 GN=MCM3 PE=1 SV=3
609	1131	Q8NCA5	FAM98A	20.8	3	3	306000	1	1	1		55272	Protein FAM98A OS=Homo sapiens OX=9606 GN=FAM98A PE=1 SV=2
600	1054	Q5T5P2	KIAA1217	20.79	2	2	316000	1	1	1	Deamidation (NQ)	214114	Sickle tail protein homolog OS=Homo sapiens OX=9606 GN=KIAA1217 PE=1 SV=2
740	1166	P04075	ALDOA	20.7	4	4	204000	1	1	1		39420	Fructose-bisphosphate aldolase A OS=Homo sapiens OX=9606 GN=ALDOA PE=1 SV=2
742	1168	Q59GN2	RPL39P5	20.65	20	20	521000	1	1	1		6323	Putative 60S ribosomal protein L39-like 5 OS=Homo sapiens OX=9606 GN=RPL39P5 PE=5 SV=2
648	1071	O75534	CSDE1	20.65	2	2	59800	1	1	1	Carbamidomethylation	88885	Cold shock domain-containing protein E1 OS=Homo sapiens OX=9606 GN=CSDE1 PE=1 SV=2
657	1147	O43166	SIPA1L1	20.64	0	0	41400	1	1	1		200028	Signal-induced proliferation-associated 1-like protein 1 OS=Homo sapiens OX=9606 GN=SIPA1L1 PE=1 SV=4
743	1173	Q9Y4F1	FARP1	20.62	1	1	0	1	1	1		118633	FERM ARHGEF and pleckstrin domain-containing protein 1 OS=Homo sapiens OX=9606 GN=FARP1 PE=1 SV=1
658	1151	P46937	YAP1	20.5	2	2	159000	1	1	1		54462	Transcriptional coactivator YAP1 OS=Homo sapiens OX=9606 GN=YAP1 PE=1 SV=2
660	1171	P49748	ACADVL	20.48	2	2	168000	1	1	1	Carbamidomethylation	70390	Very long-chain specific acyl-CoA dehydrogenase mitochondrial OS=Homo sapiens OX=9606 GN=ACADVL PE=1 SV=1
745	1200	Q16795	NDUFA9	20.3	3	3	190000	1	1	1		42510	NADH dehydrogenase [ubiquinone] 1 alpha subcomplex subunit 9 mitochondrial OS=Homo sapiens OX=9606 GN=NDUFA9 PE=1 SV=2
746	1202	P07942	LAMB1	20.29	1	1	268000000	1	1	1	Deamidation (NQ)	198037	Laminin subunit beta-1 OS=Homo sapiens OX=9606 GN=LAMB1 PE=1 SV=2
547	1014	Q96Q15	SMG1	20.19	0	0	0	1	1	1	Deamidation (NQ)	410501	Serine/threonine-protein kinase SMG1 OS=Homo sapiens OX=9606 GN=SMG1 PE=1 SV=3
556	915	Q92878	RAD50	20.14	1	1	141000	1	1	1		153892	DNA repair protein RAD50 OS=Homo sapiens OX=9606 GN=RAD50 PE=1 SV=1
536	1212	Q9HBX8	LGR6	20.08	1	1	1860000	1	1	1		104298	Leucine-rich repeat-containing G-protein coupled receptor 6 OS=Homo sapiens OX=9606 GN=LGR6 PE=1 SV=3
537	1216	P27815	PDE4A	20.05	1	1	527000	1	1	1	Oxidation (M)	98143	cAMP-specific 3' 5'-cyclic phosphodiesterase 4A OS=Homo sapiens OX=9606 GN=PDE4A PE=1 SV=3
482	1104	D6RIA3	C4orf54	20.04	1	1	4330000	1	1	1	Deamidation (NQ)	190073	Uncharacterized protein C4orf54 OS=Homo sapiens OX=9606 GN=C4orf54 PE=2 SV=1
